# Supplementary material for: A novel tetrathiafulvalene based liquid crystalline organogelator: synthesis, self-assembly properties and potential utilization
Source: Royal Society of Chemistry journal article supplement (doi:10.1039/d2nj04062j), 2022-01-01
Supplement: d2nj04062j1.pdf [file d2nj04062j1.pdf]

## Supplementary Data

### **A novel tetrathiafulvalene based liquid crystalline organogelator: synthesis, self-assembly properties and potential utilization**

Chao Xu,<sup>a,b</sup> Li Wang,<sup>a,b</sup> Yan Xia,<sup>a,b</sup> Dongfeng Li,<sup>a</sup> Bingzhu Yin<sup>\*c</sup> and Ruibin Hou <sup>\*a,b</sup>

<sup>a</sup> School of Chemistry and Life Science, Changchun University of Technology, Changchun, Jilin 130012, PR China

<sup>b</sup> Advanced Institute of Materials Science, Changchun University of Technology, Changchun, Jilin 130012, PR China

<sup>c</sup> Key Laboratory of Natural Resources of Changbai Mountain & Functional Molecules, Yanbian University, Ministry of Education, Yanji, Jilin 133002, PR China

# 1. Instrumentation

## NMR experiments

All solution state NMR studies were carried out on Bruker AV-400 Spectrometer (400 MHz for  $^1\text{H}$  and 75 MHz for  $^{13}\text{C}$ ) and chemical shifts were referenced relative to tetramethylsilane ( $\delta_{\text{H}}/\delta_{\text{C}}=0$ ).

## FT-IR spectroscopy

IR spectra were recorded on a Nicolet iS 50 FT-IR instrument with the KBr disk technique.

## MALDI-TOF-MS spectrometry

MALDI-TOF-MS was performed on a Bruker autoflexIII using a 1,8,9-anthracenetriol (DITH) matrix.

## Small-angle X-ray diffracting

Small-angle X-ray scattering (SAXS) measurements were carried out at 298 K on a beam line 1W2A synchrotron radiation X-ray small angle system at Beijing Synchrotron Radiation Facility ( $\lambda = 1.54\text{\AA}$ ).

From the experimental values of the unit cell parameters ( $a$ ,  $b$ ,  $c$ , and  $\gamma$ ) and the density ( $\rho$ ), the average number of molecules per cross-sectional slice of the column can be calculated according to Eq 1, where  $M$  is the molecular mass and  $N_A$  is Avogadro's number

$$n = abc\rho N_A \sin\gamma / M \quad \text{Eq S1.}$$

## Scanning electron microscope (SEM)

The gel samples were placed on a silicon wafer, and dried for a couple of hours under room temperature before imaging. A layer of gold was sputtered on top to form a conducting surface

and finally the specimen was transferred into a Field Emission Scanning Electron Microscope (JEOL7610 FE-SEM).

# <sup>1</sup>H, <sup>13</sup>C NMR, IR and MALDI-TOF-MS Spectra

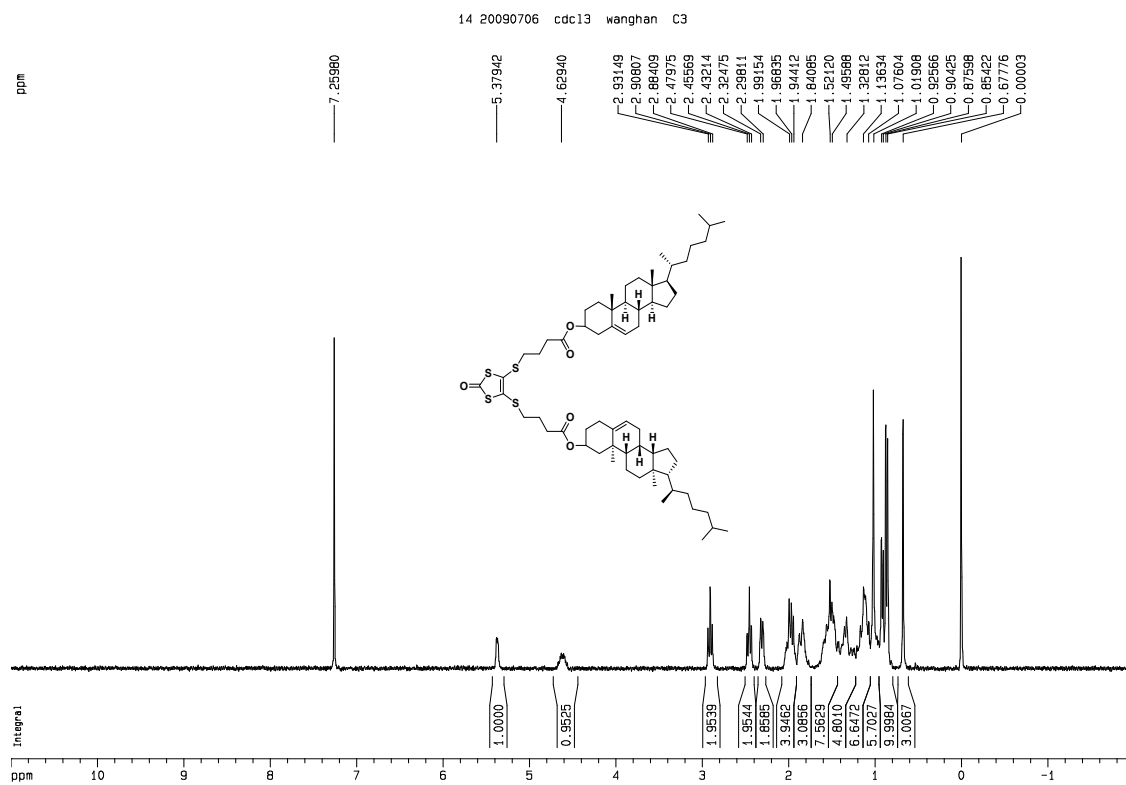

Fig. S1 <sup>1</sup>H NMR of derivative 3a

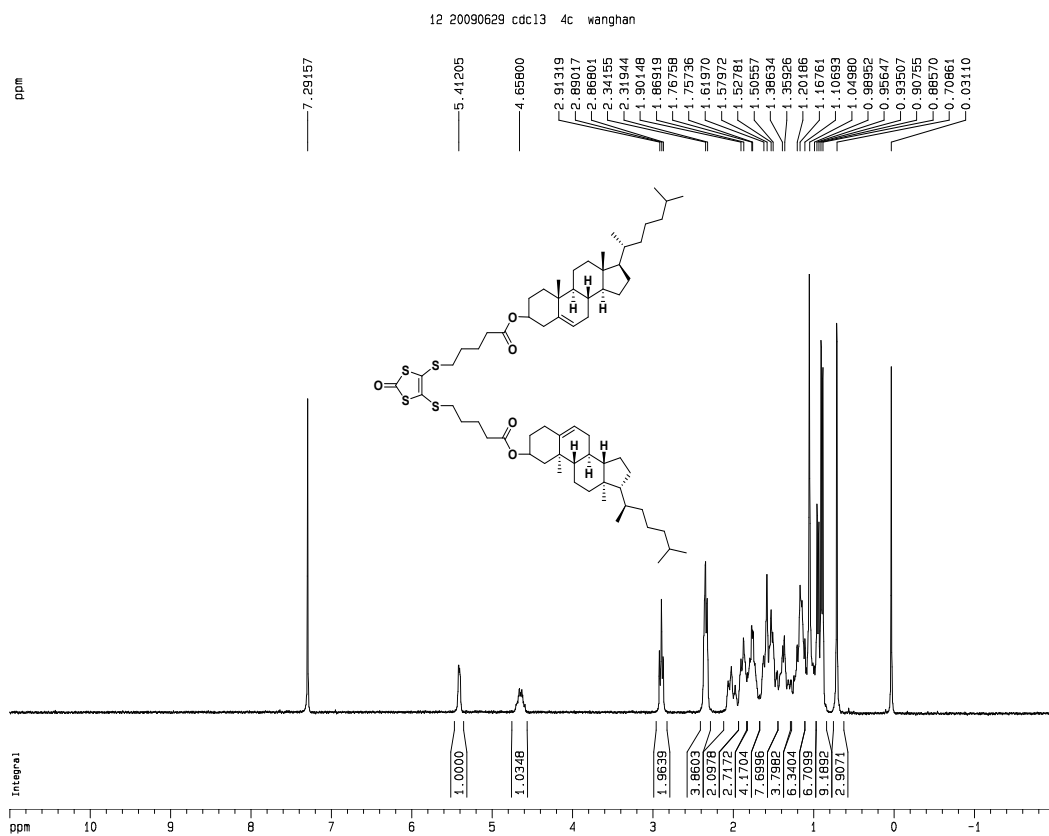

Fig. S2  $^1\text{H}$  NMR of derivative **3b**

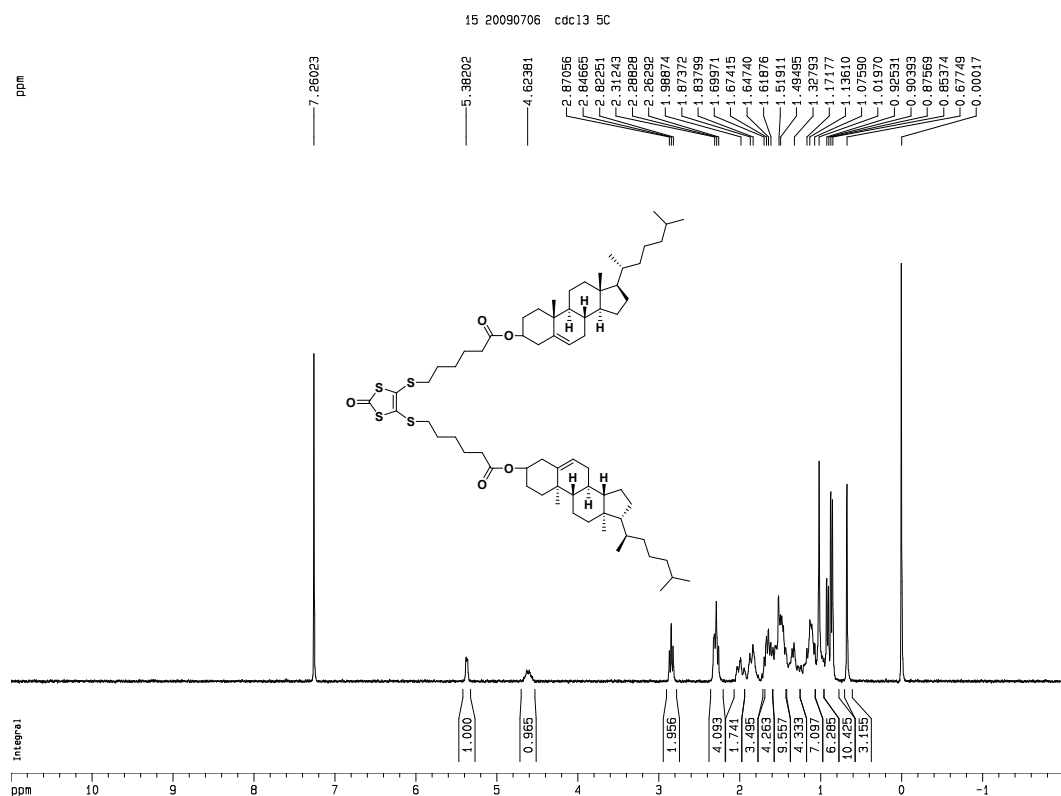

Fig. S3  $^1\text{H}$  NMR of derivative 3c

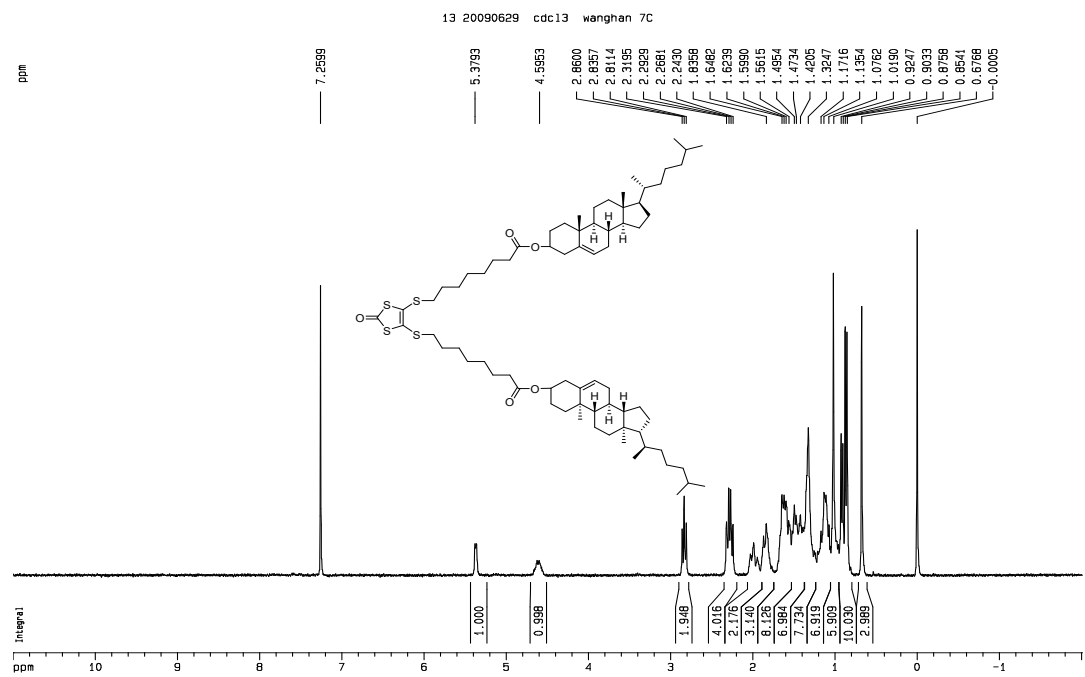

**Fig. S4**  $^1\text{H}$  NMR of derivative **3d**

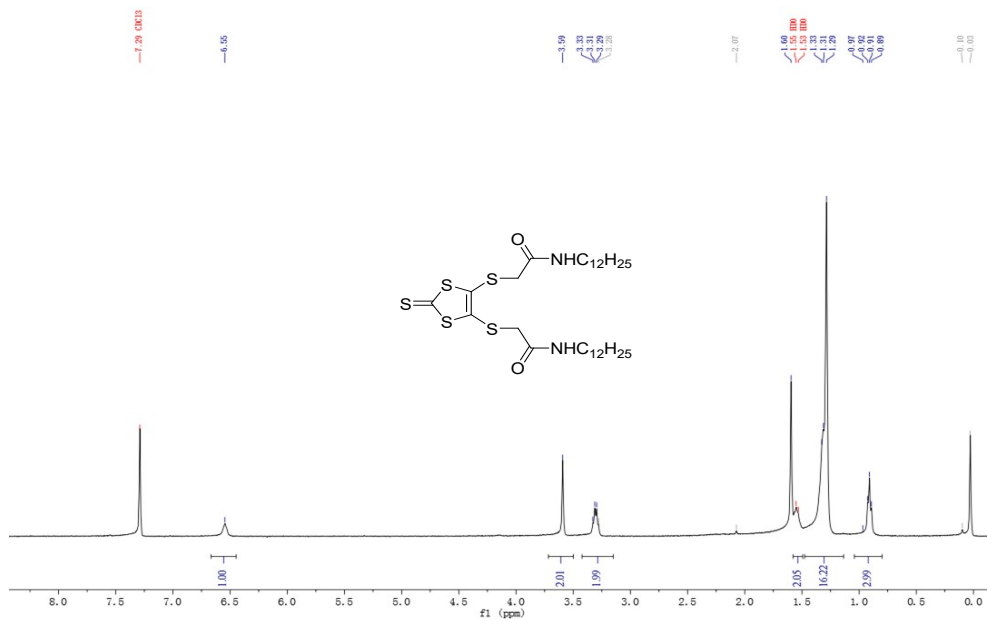

Fig. S5 <sup>1</sup>H NMR of derivative 2a



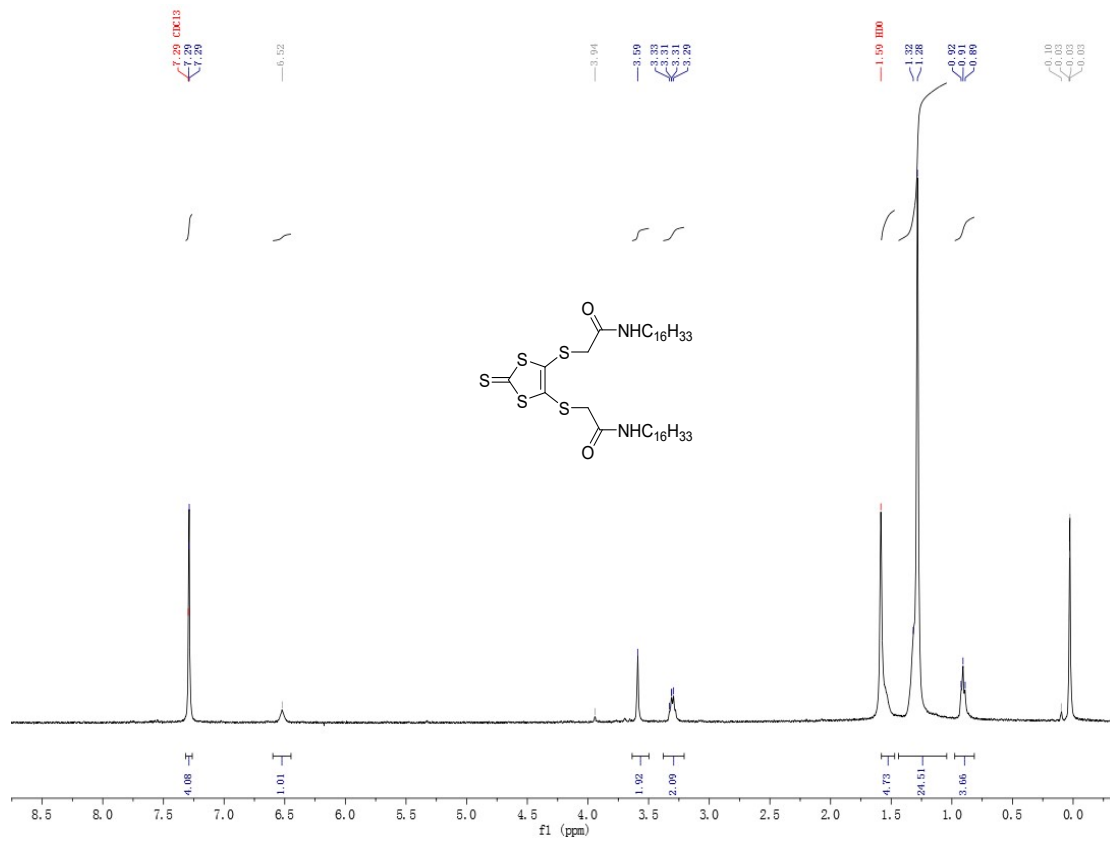

**Fig. S6**  $^1\text{H}$  NMR of derivative **2b**

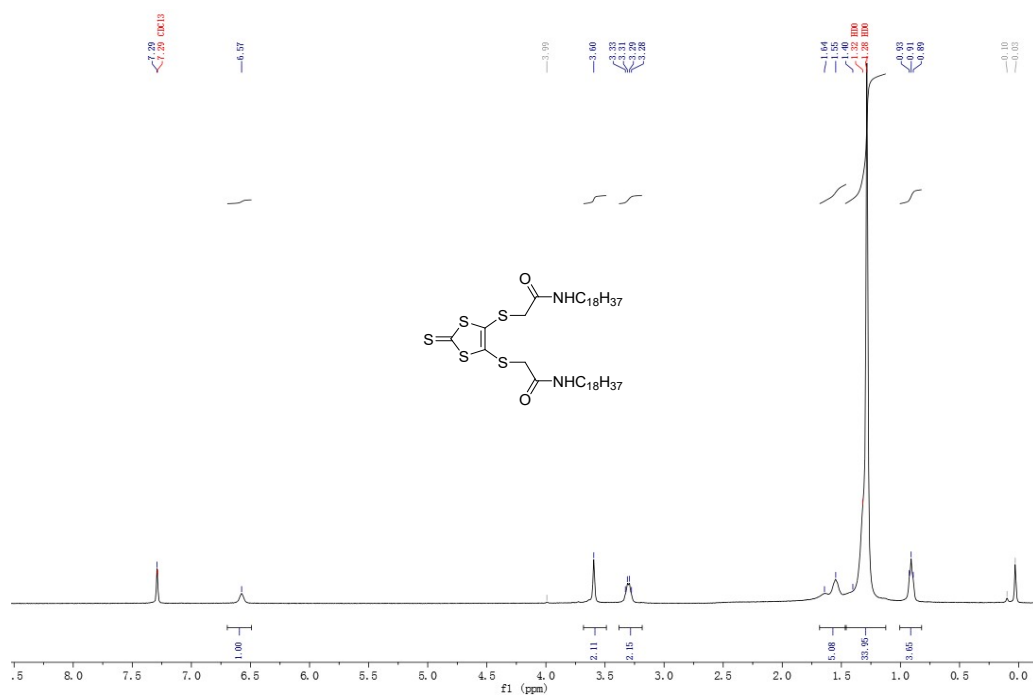

**Fig. S7** <sup>1</sup>H NMR of the derivative **2c**

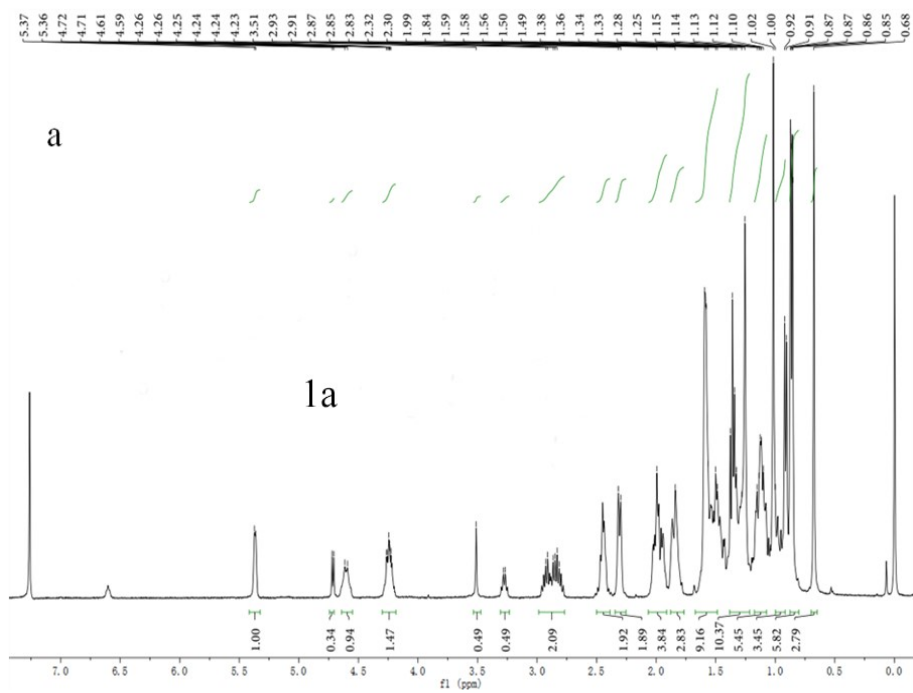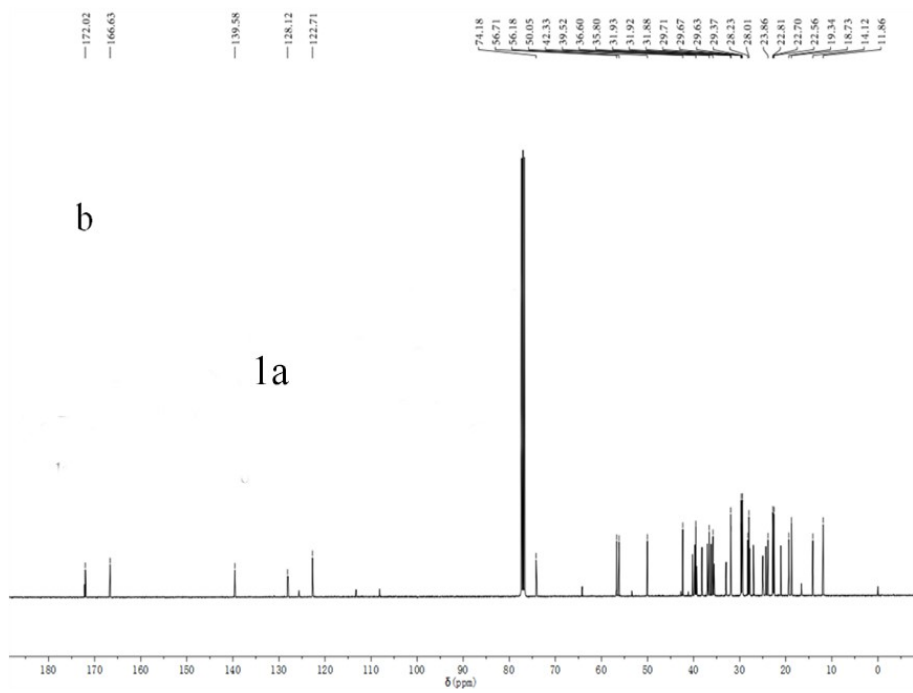

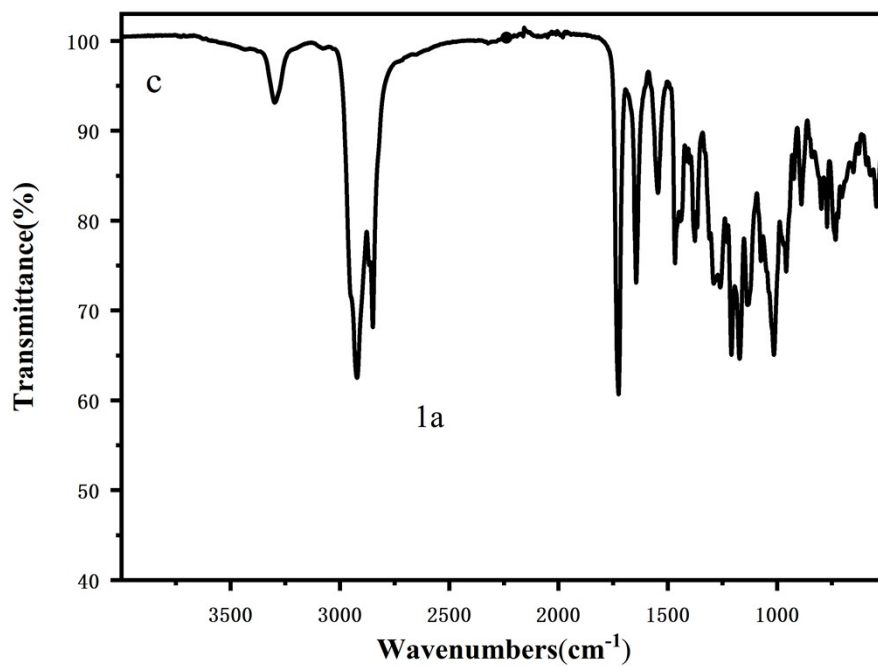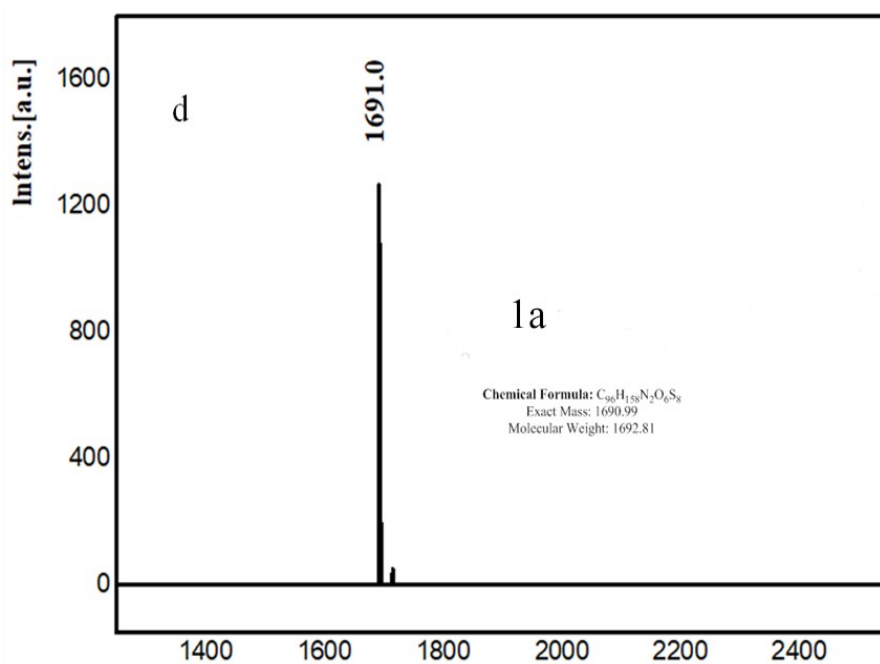

**Fig. S8 (a)**  $^1\text{H}$  NMR of the target compound **1a**  
**(b)**  $^{13}\text{C}$  NMR of the target compound **1a**  
**(c)** FT-IR of the target compound **1a**  
**(b)** MALDI-TOF-MS of the target compound **1a**

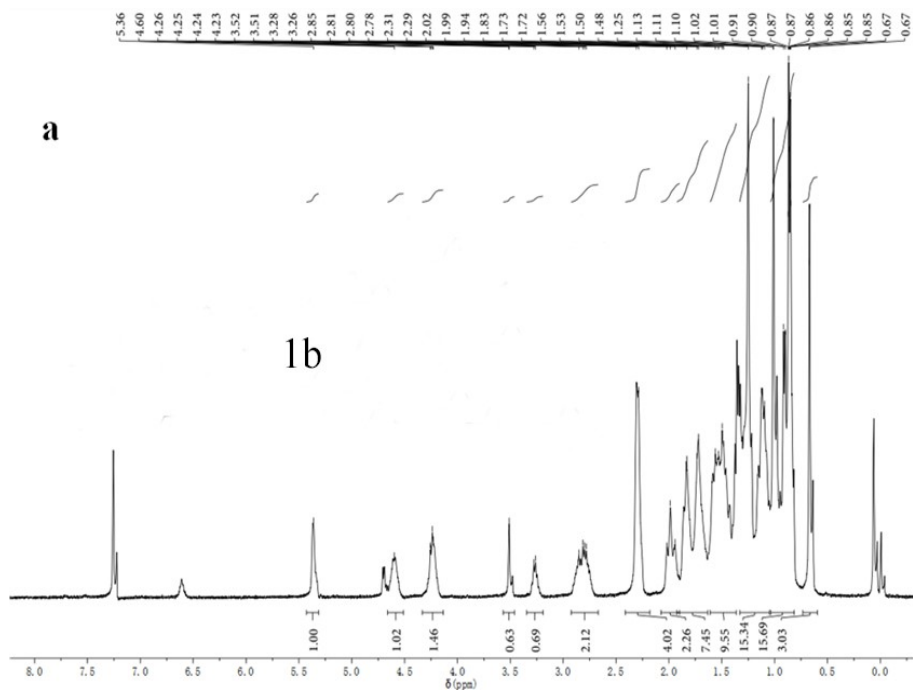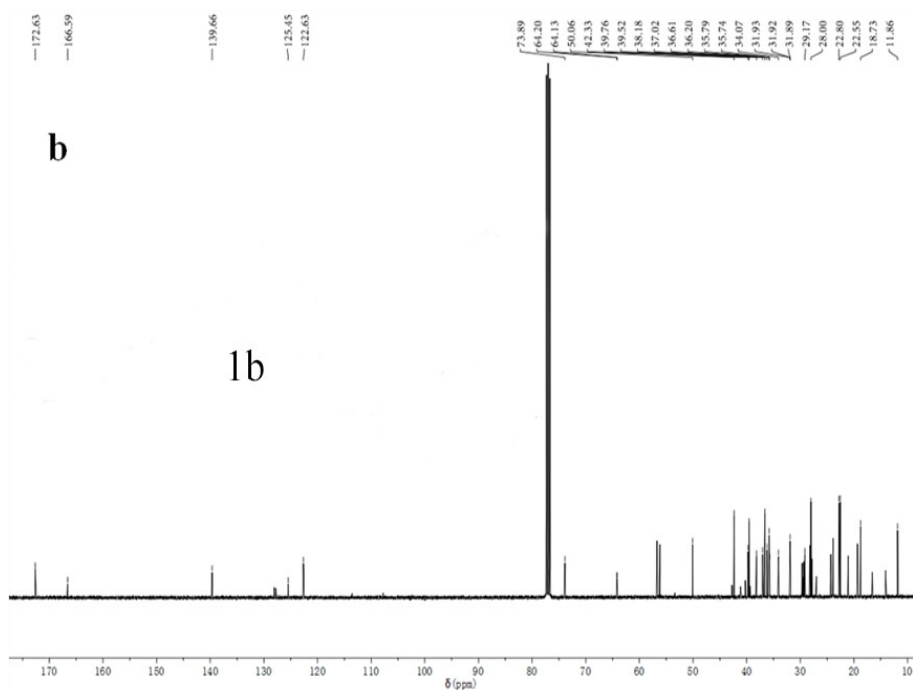

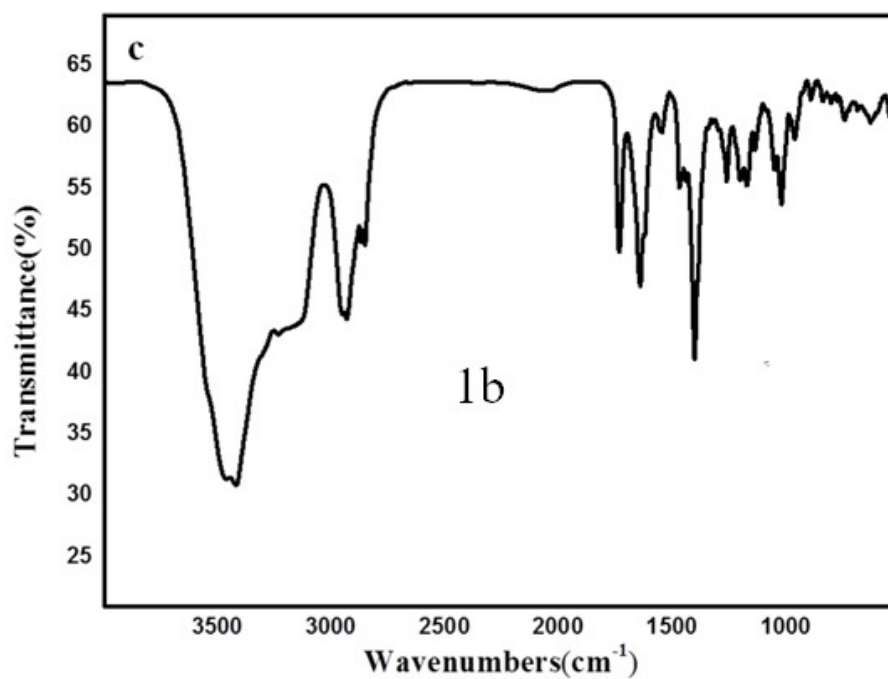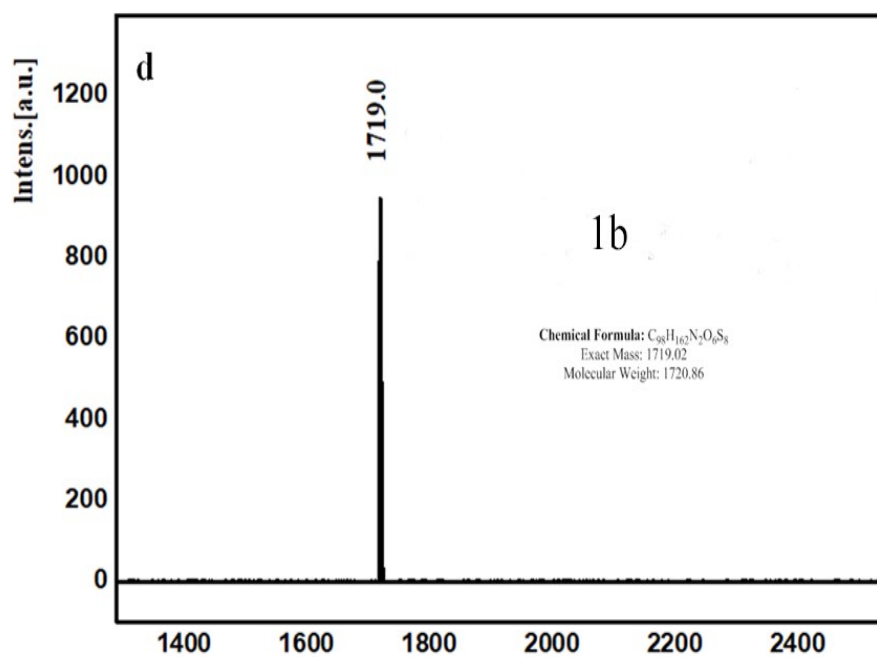

**Fig. S9** (a) <sup>1</sup>H NMR of the target compound **1b**  
(b) <sup>13</sup>C NMR of the target compound **1b**  
(c) FT-IR of the target compound **1b**  
(b) MALDI-TOF-MS of the target compound **1b**

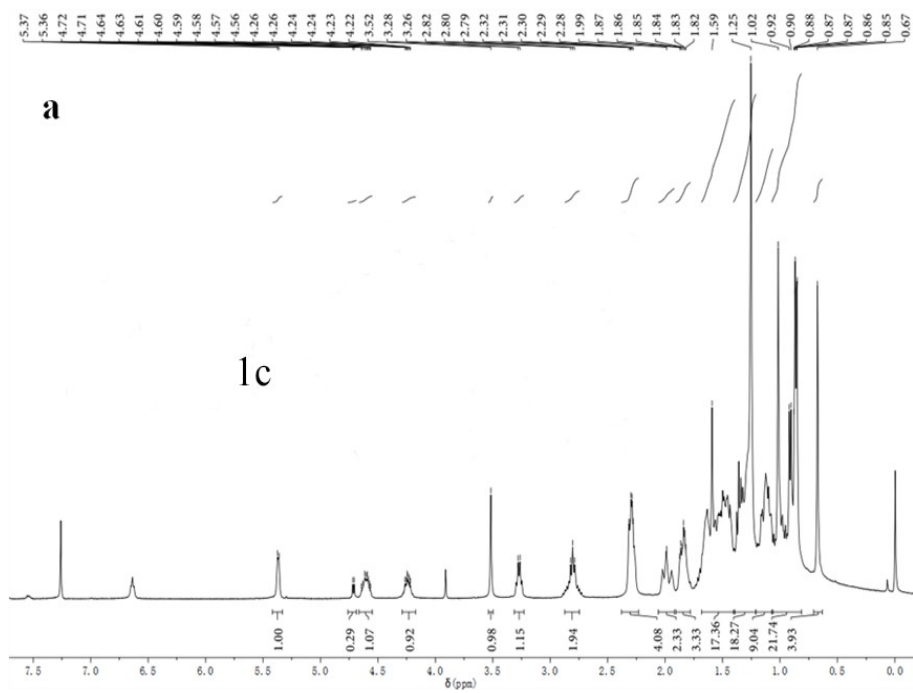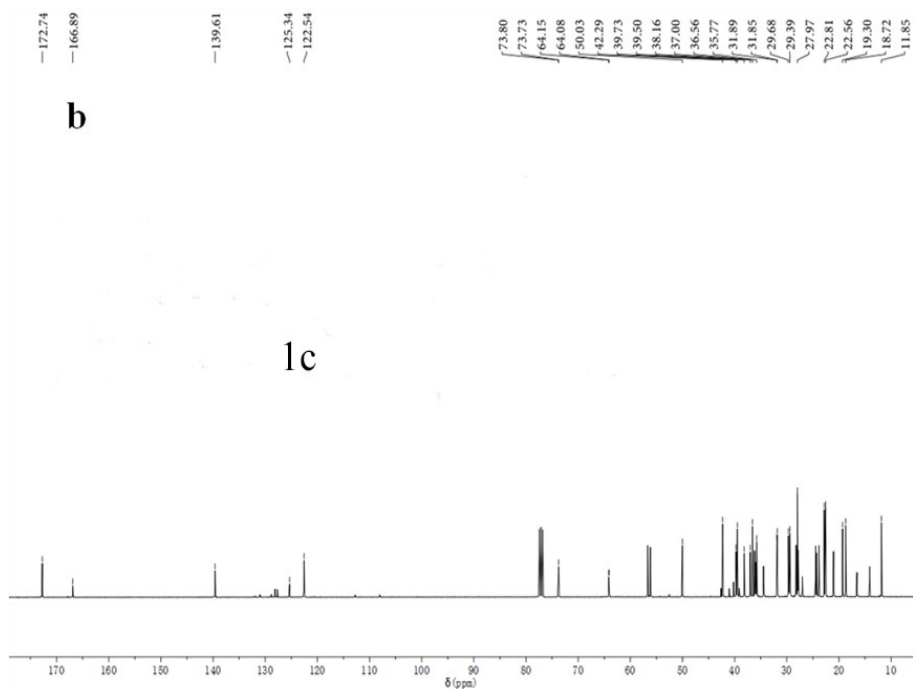

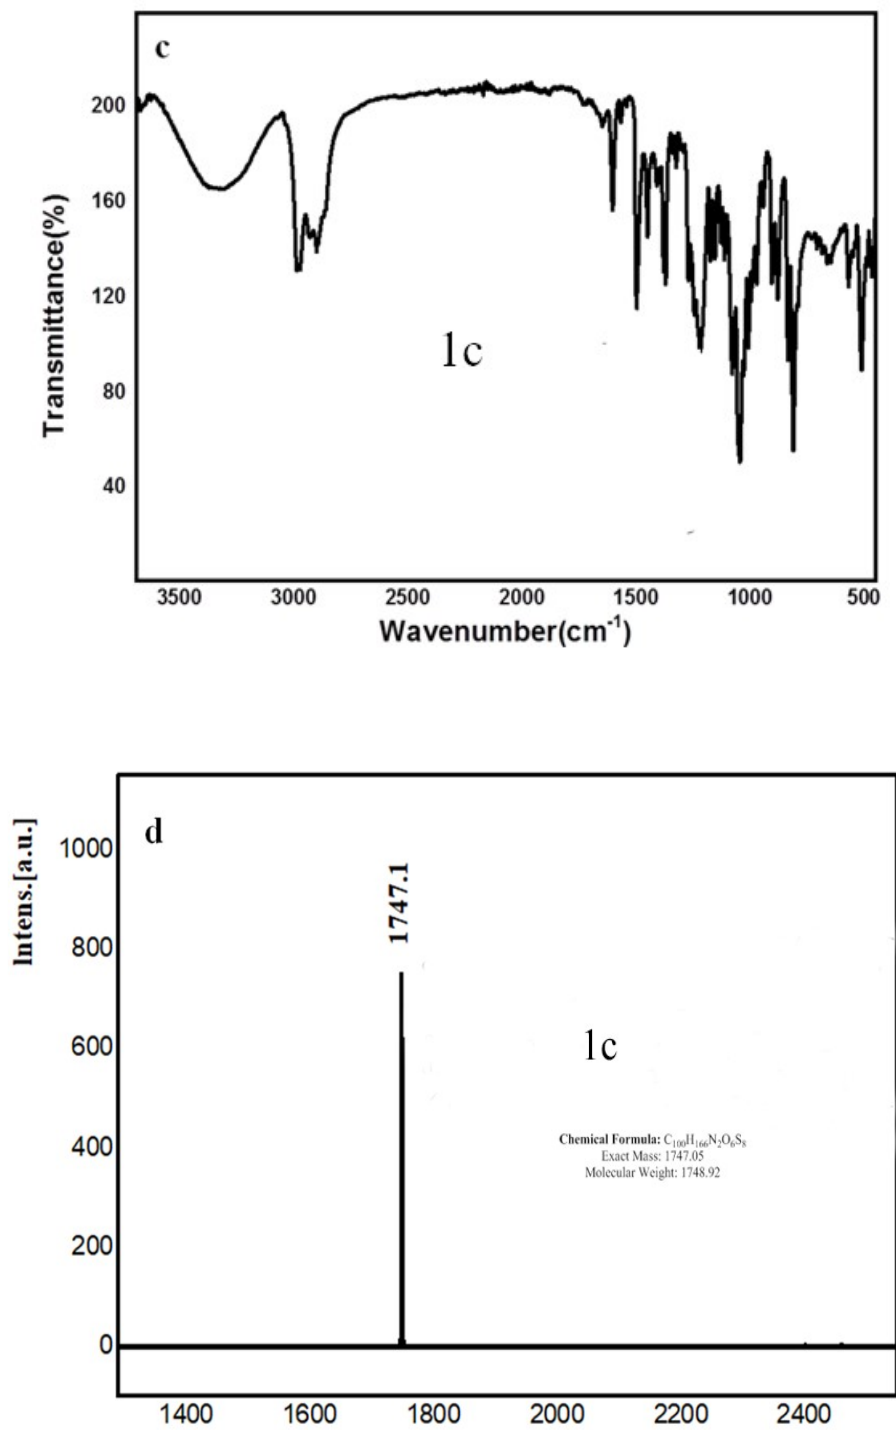

**Fig. S10** (a) <sup>1</sup>H NMR of the target compound **1c**  
(b) <sup>13</sup>C NMR of the target compound **1c**  
(c) FT-IR of the target compound **1c**  
(b) MALDI-TOF-MS of the target compound **1c**



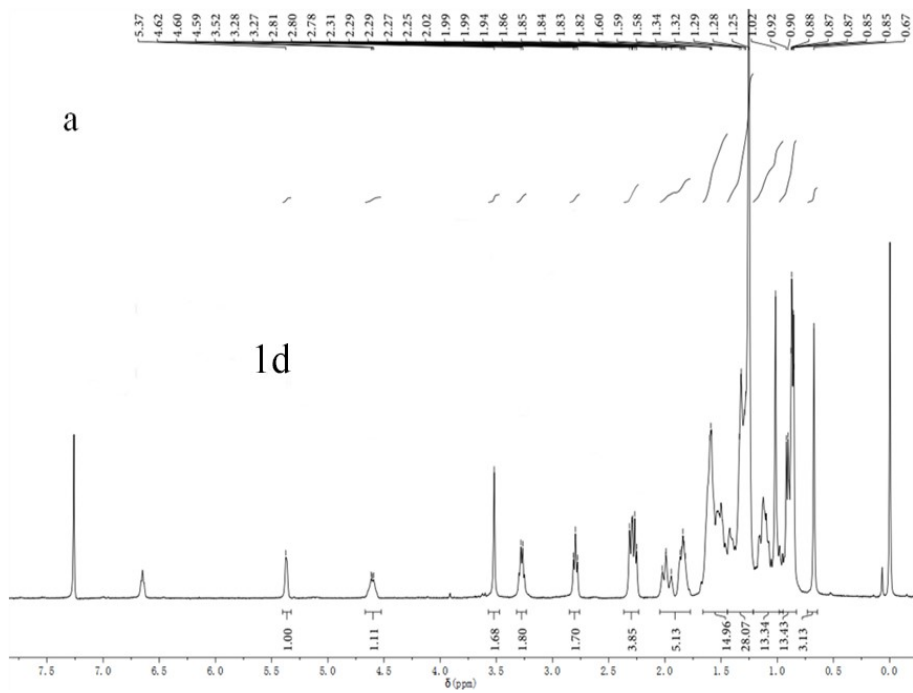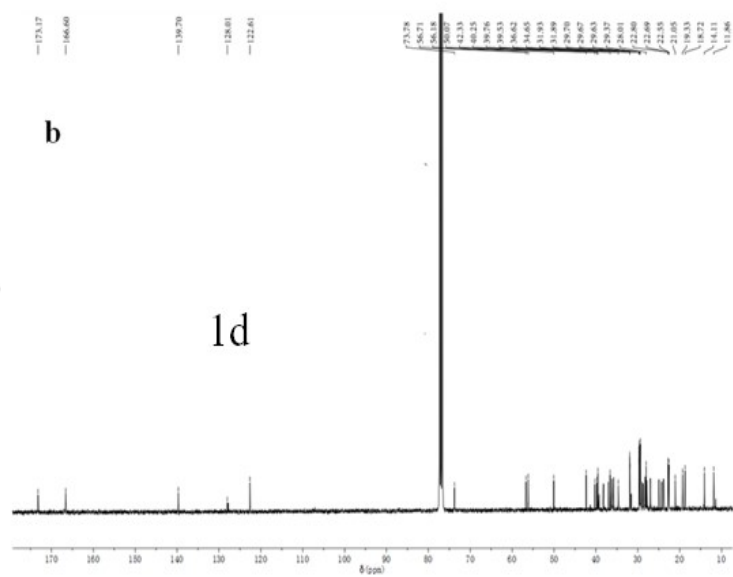

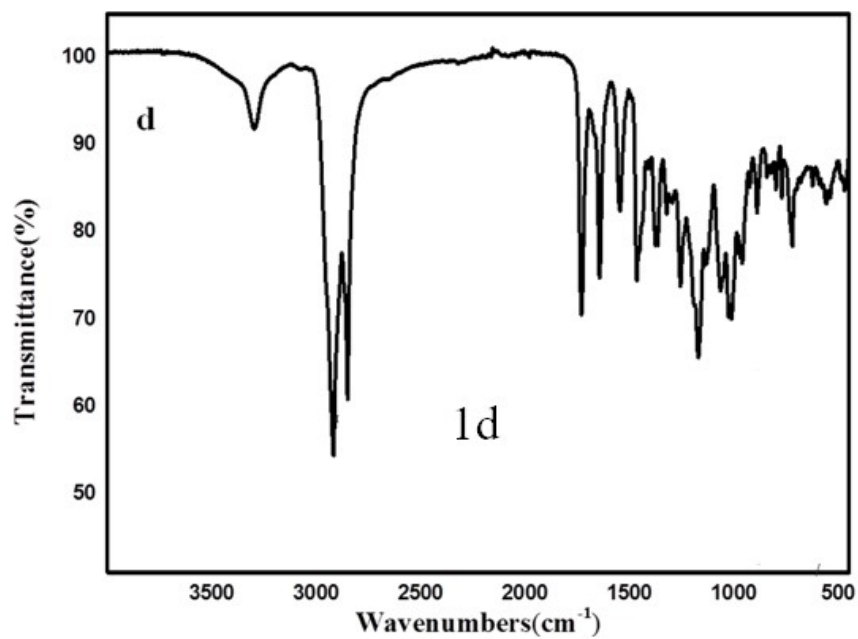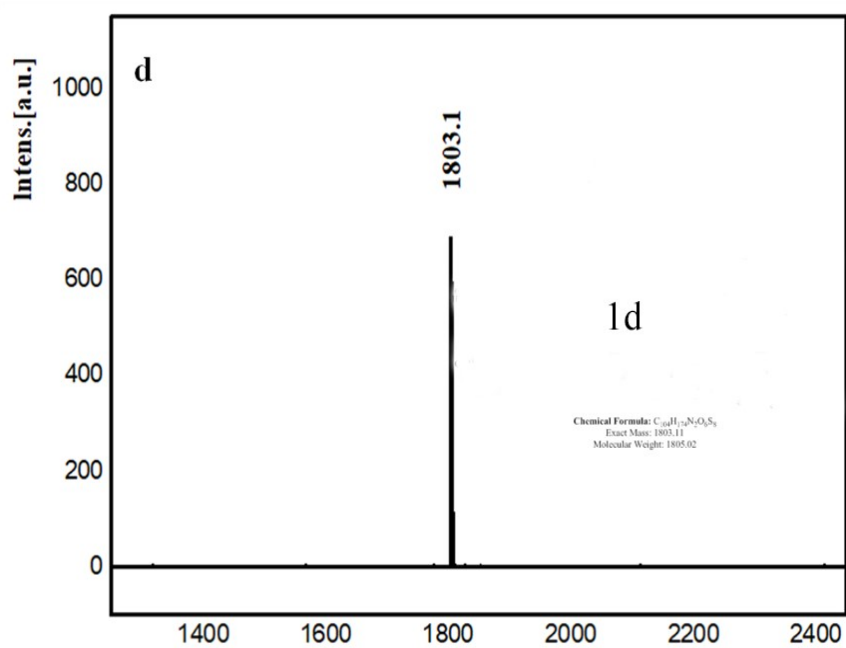

**Fig. S11 (a)**  $^1\text{H}$  NMR of the target compound **1d**

**(b)**  $^{13}\text{C}$  NMR of the target compound **1d**

**(c)** FT-IR of the target compound **1d**

**(b)** MALDI-TOF-MS of the target compound **1d**

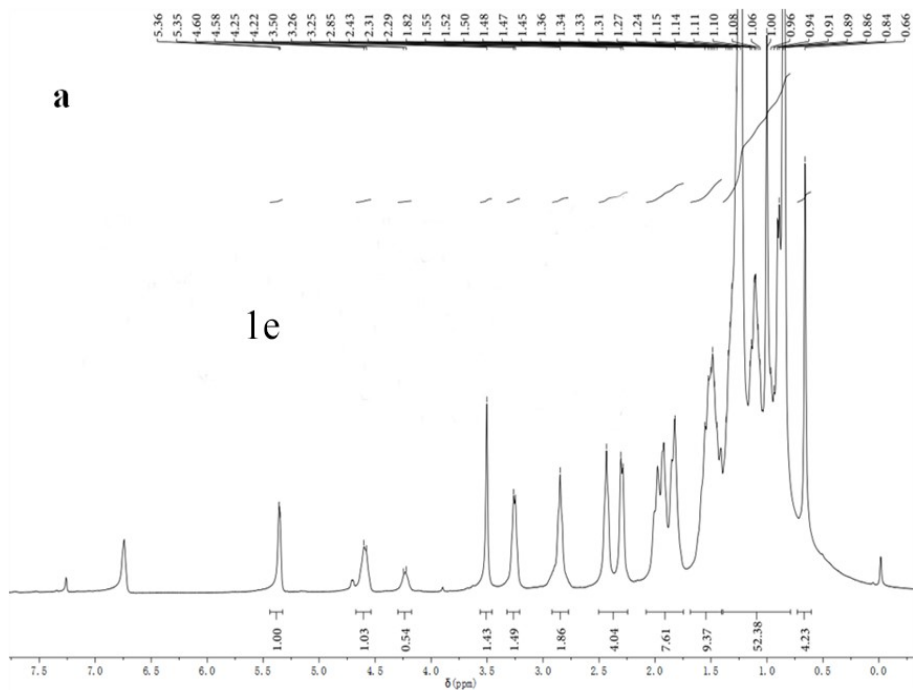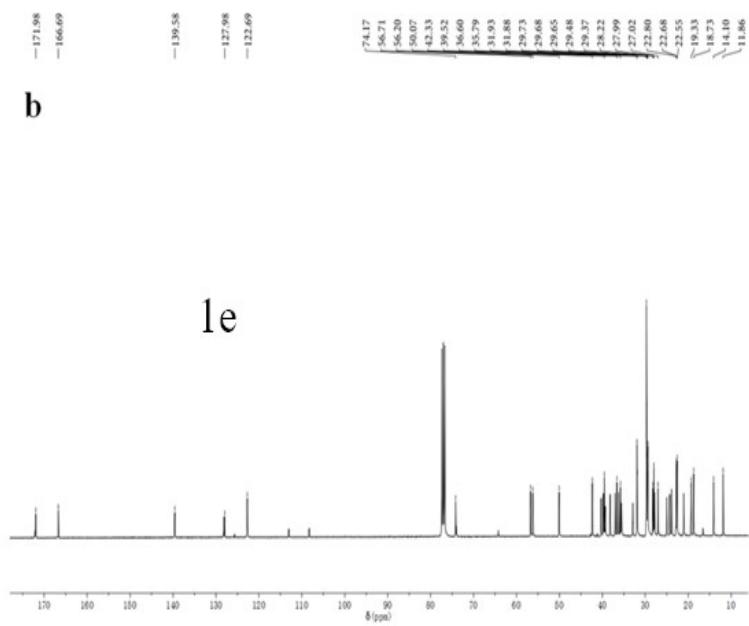

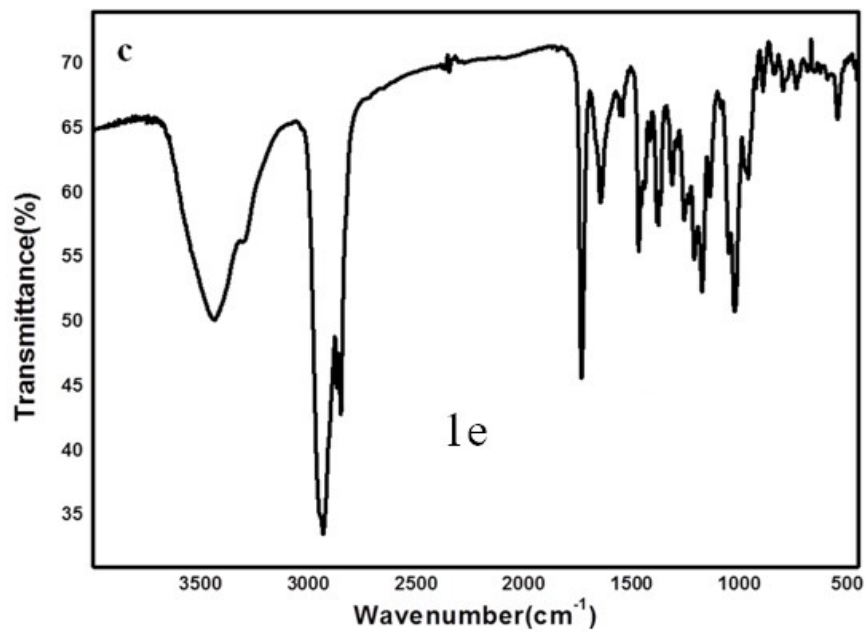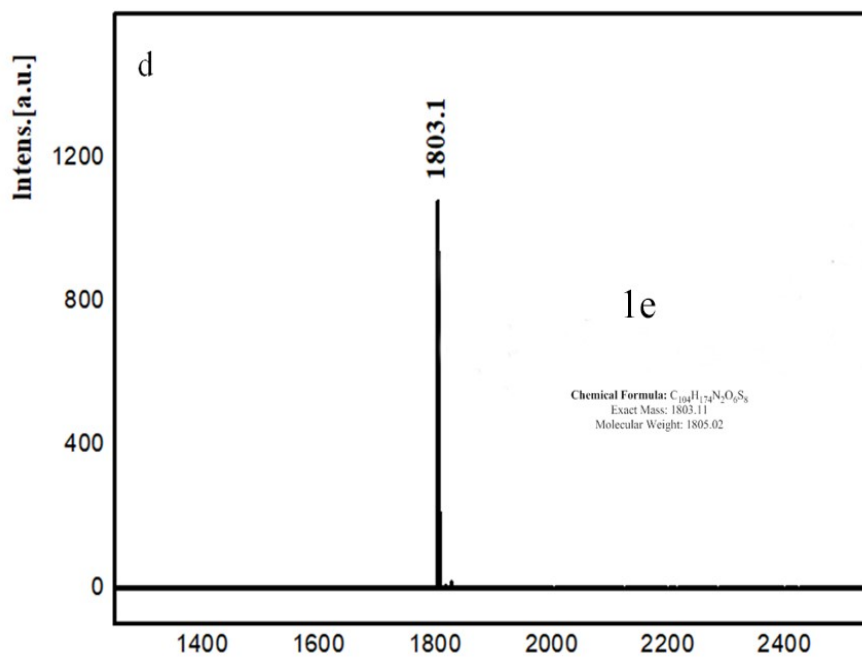

**Fig. S12 (a)** <sup>1</sup>H NMR of the target compound **1e**  
**(b)** <sup>13</sup>C NMR of the target compound **1e**  
**(c)** FT-IR of the target compound **1e**  
**(d)** MALDI-TOF-MS of the target compound **1e**

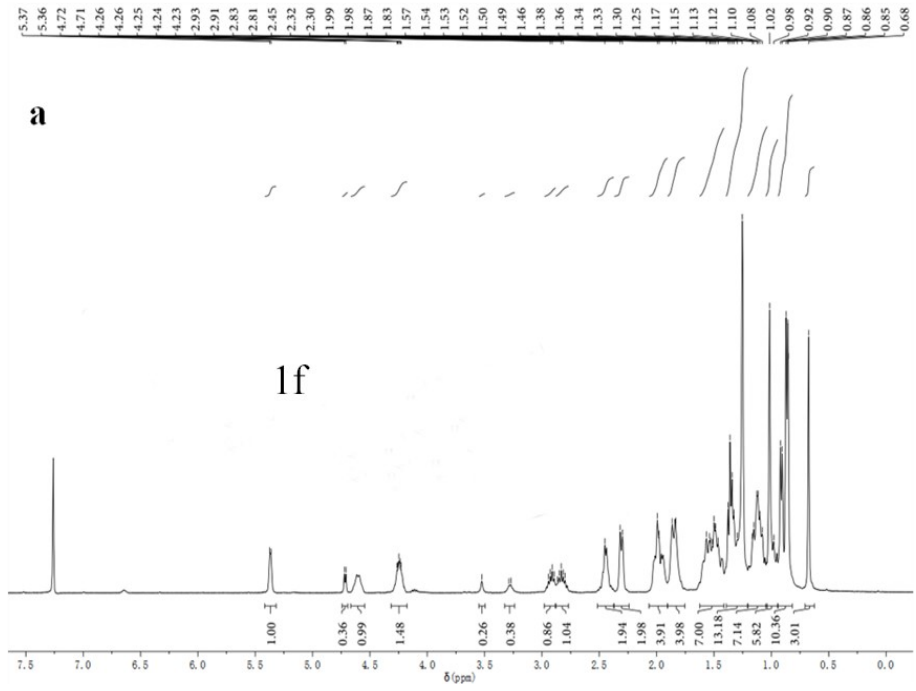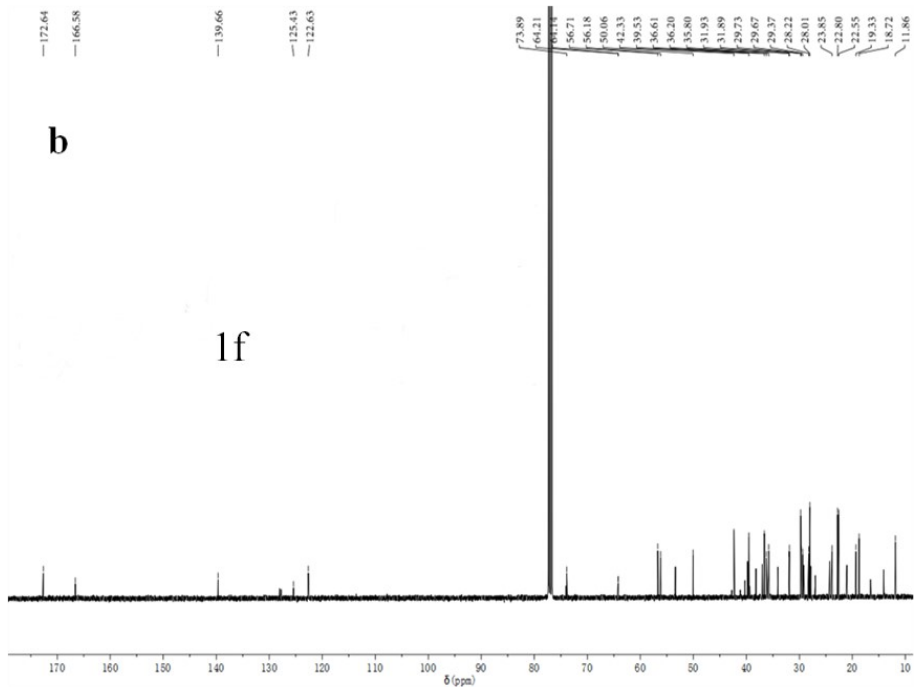

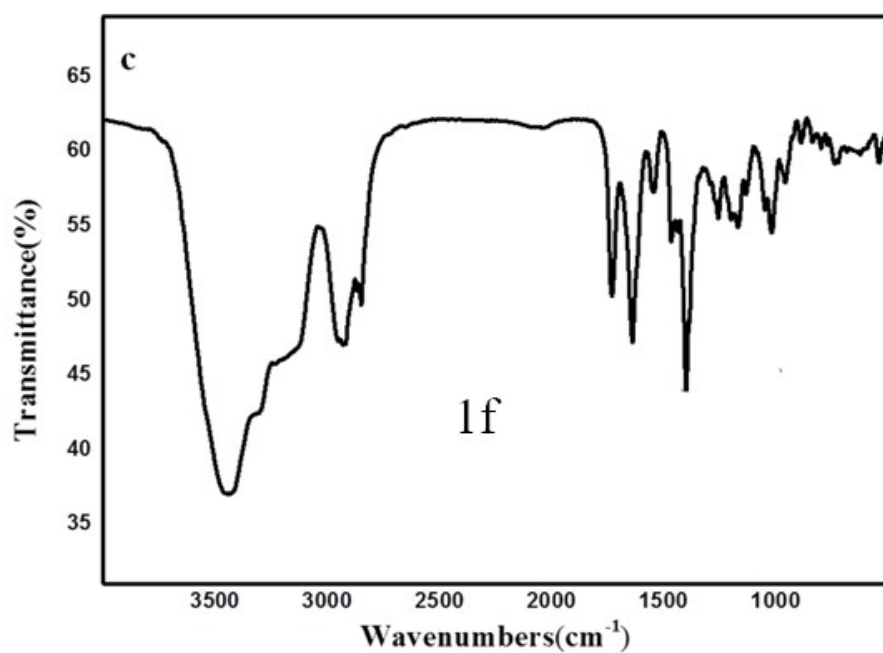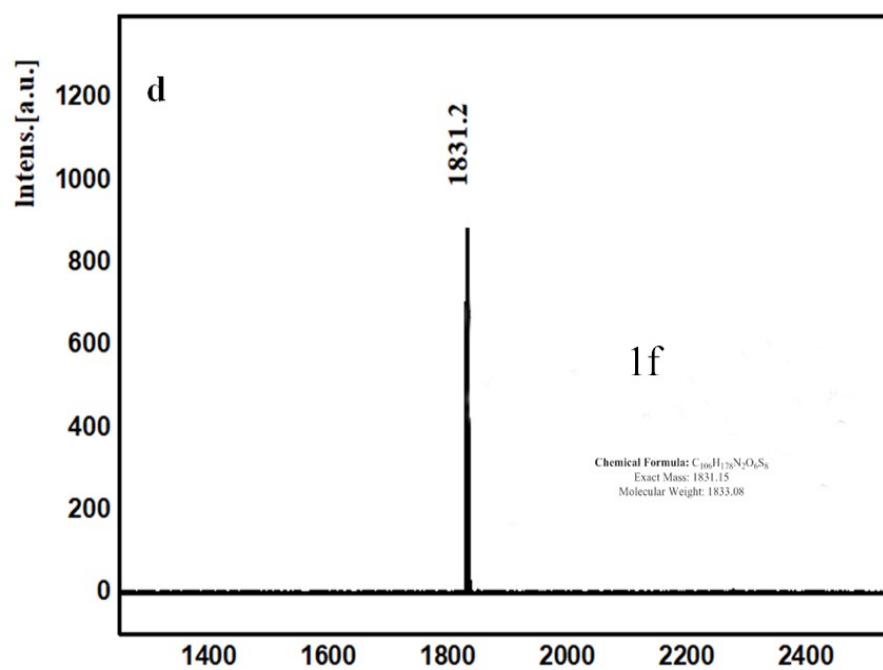

**Fig. S13 (a)** <sup>1</sup>H NMR of the target compound **1f**  
**(b)** <sup>13</sup>C NMR of the target compound **1f**  
**(c)** FT-IR of the target compound **1f**  
**(b)** MALDI-TOF-MS of the target compound **1f**

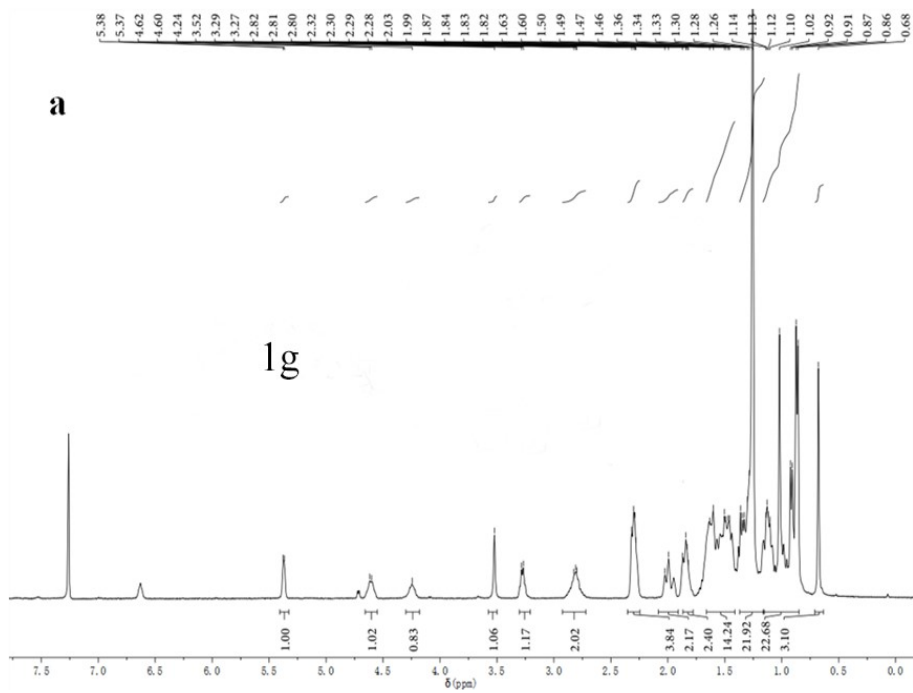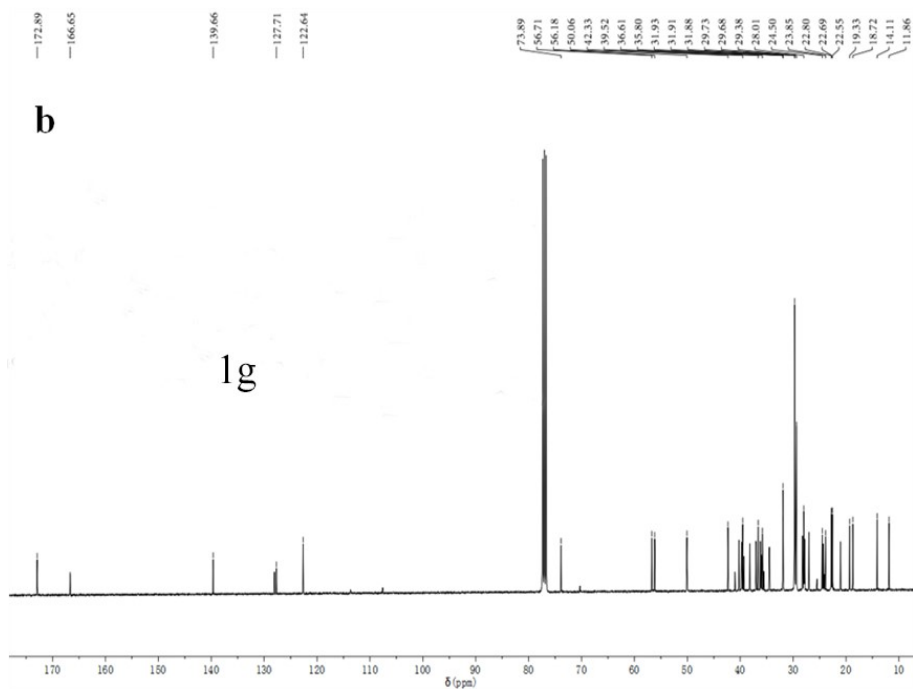

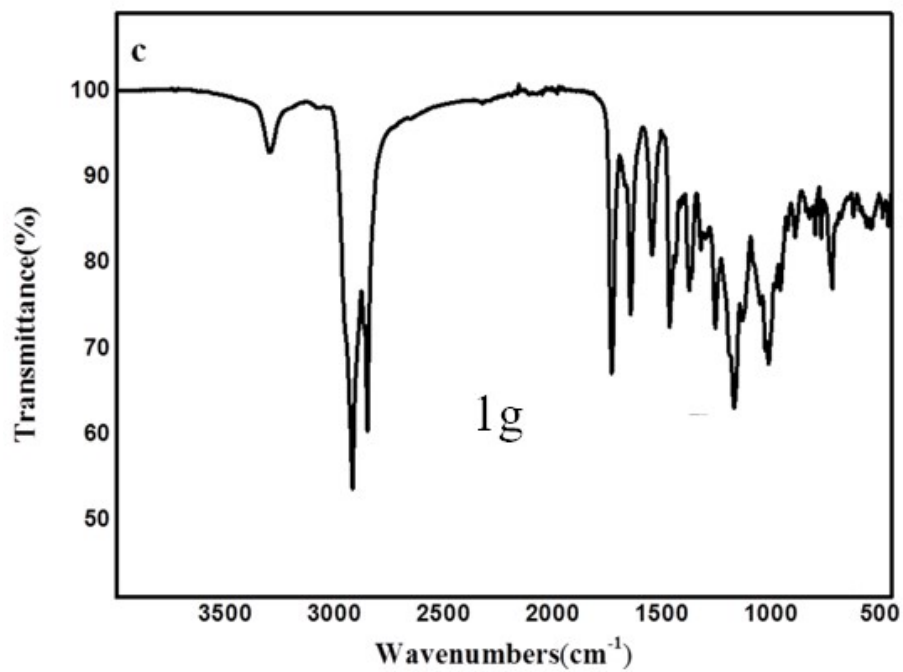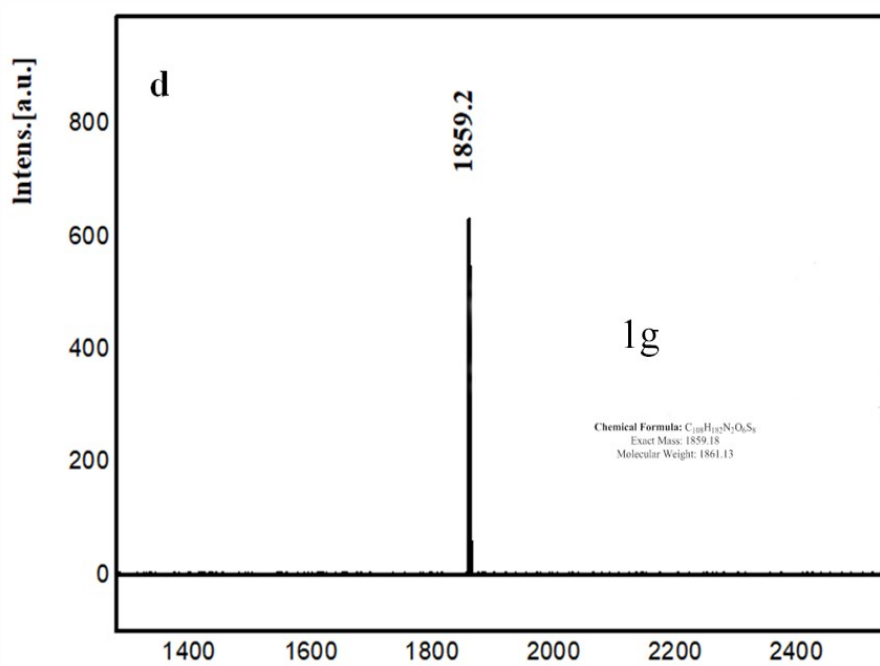

**Fig. S14 (a)** <sup>1</sup>H NMR of the target compound **1g**  
**(b)** <sup>13</sup>C NMR of the target compound **1g**  
**(c)** FT-IR of the target compound **1g**  
**(b)** MALDI-TOF-MS of the target compound **1g**



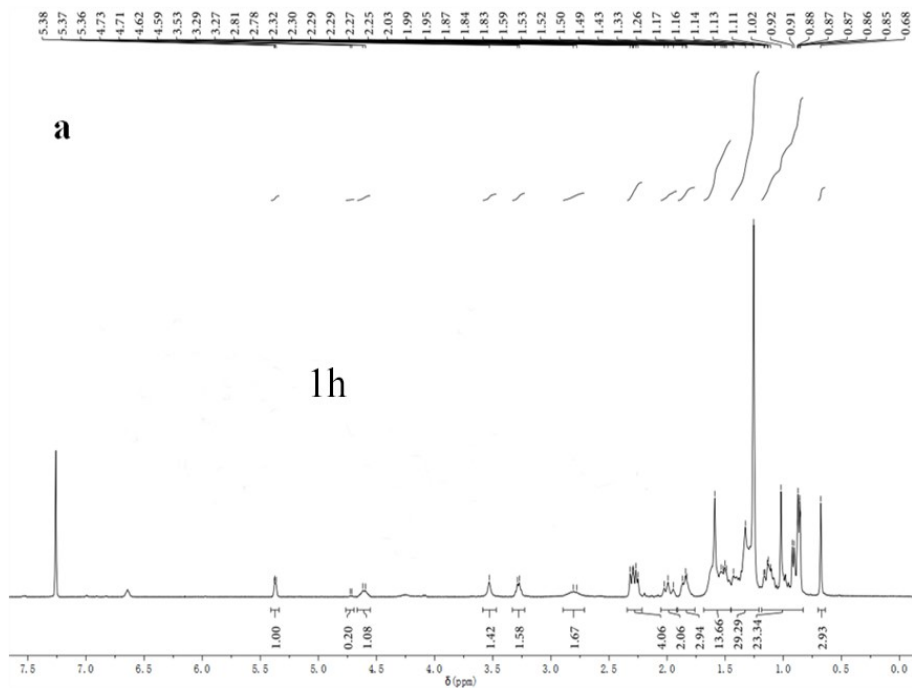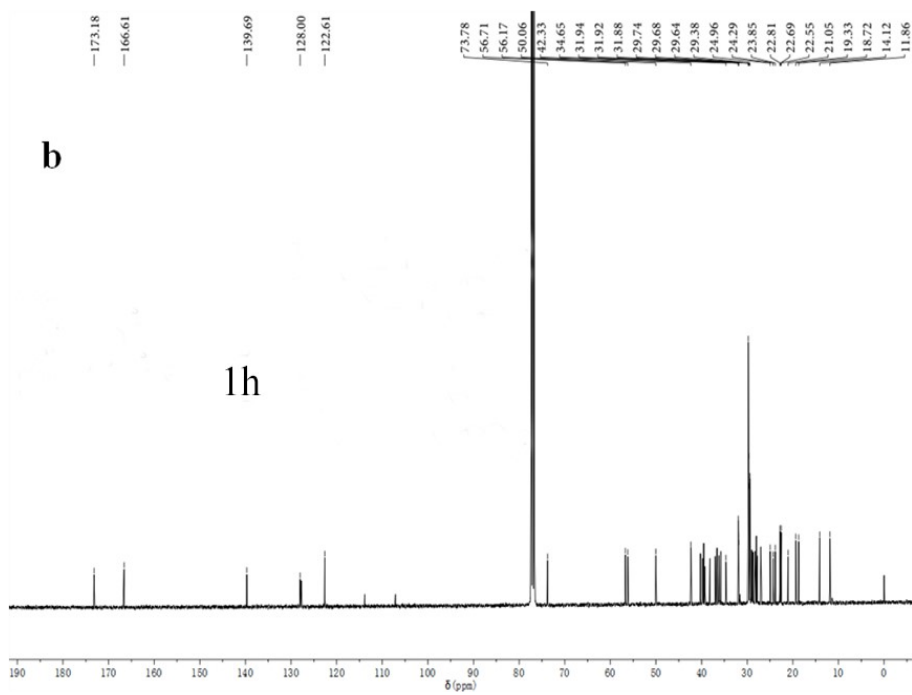

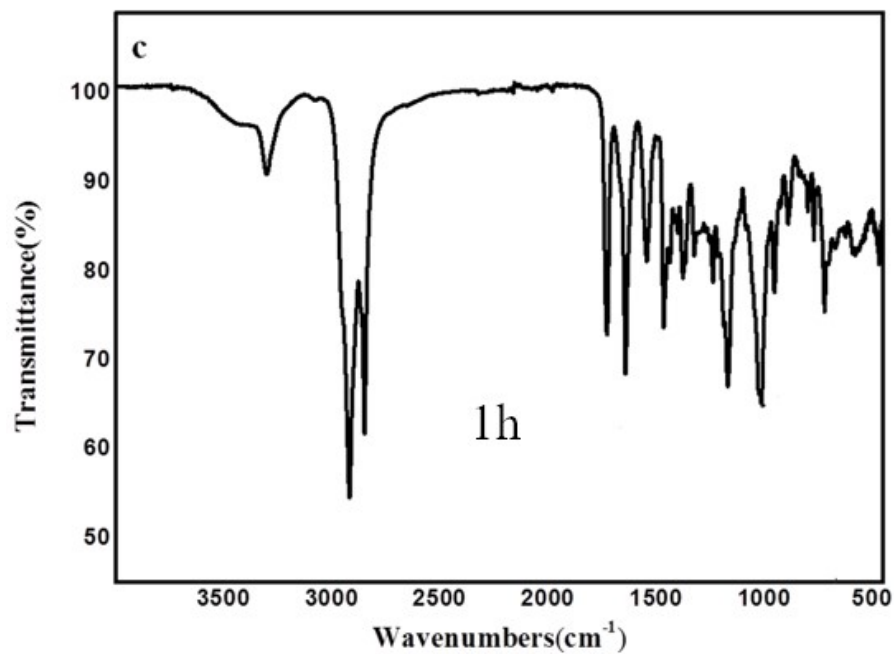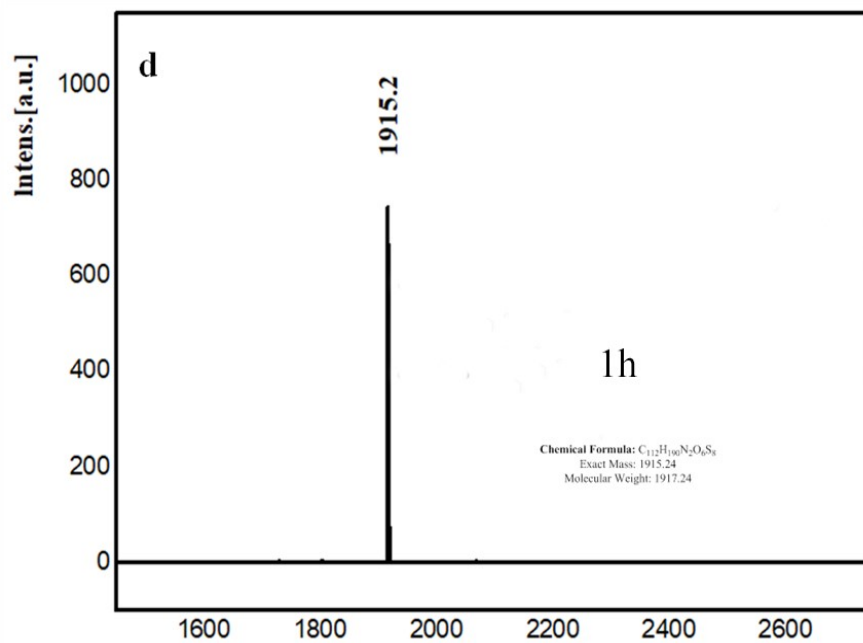

**Fig. S15 (a)** <sup>1</sup>H NMR of the target compound **1h**  
**(b)** <sup>13</sup>C NMR of the target compound **1h**  
**(c)** FT-IR of the target compound **1h**  
**(b)** MALDI-TOF-MS of the target compound **1h**

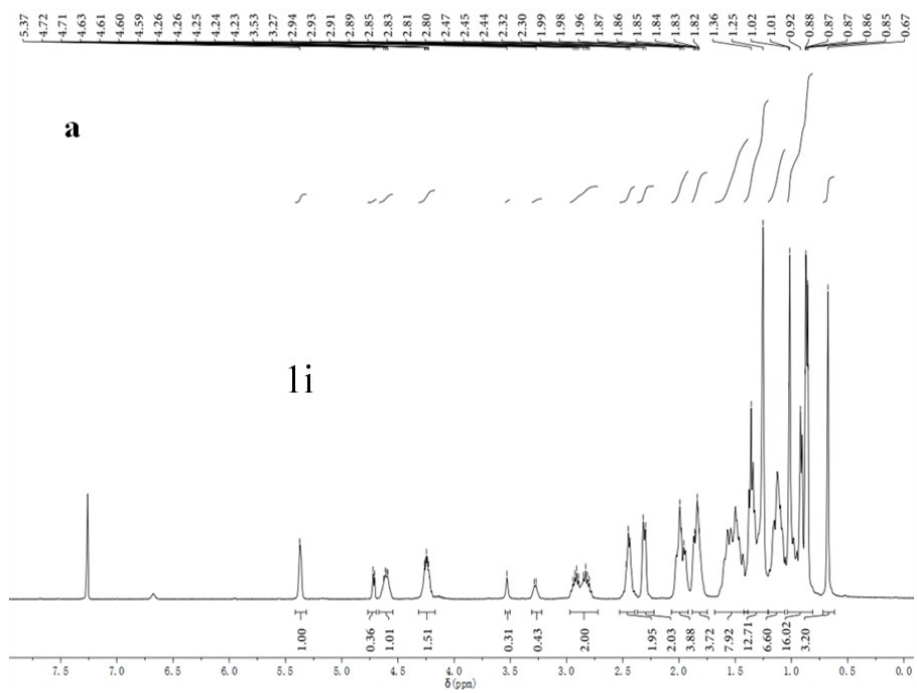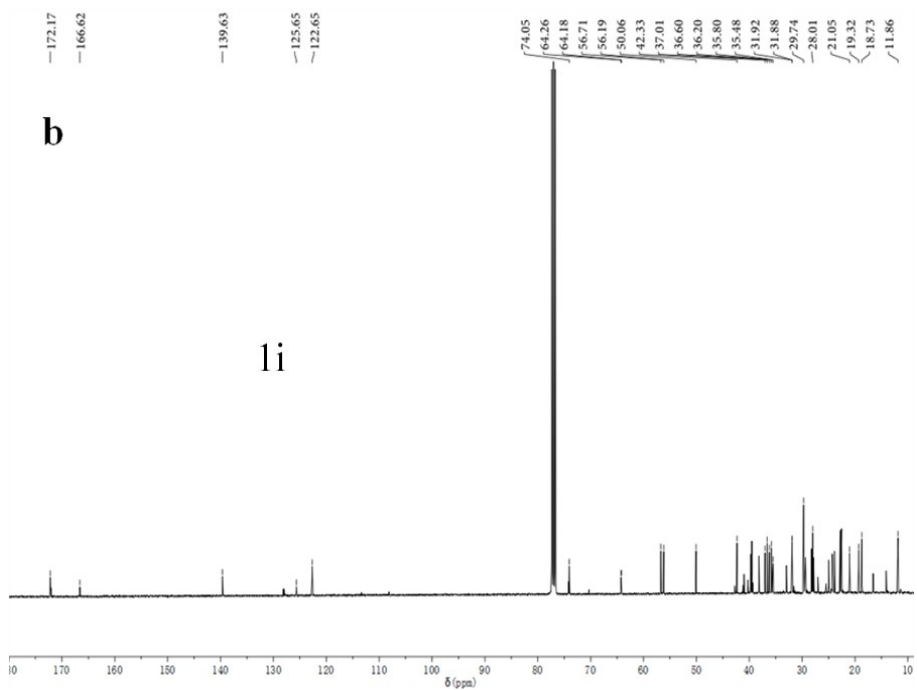

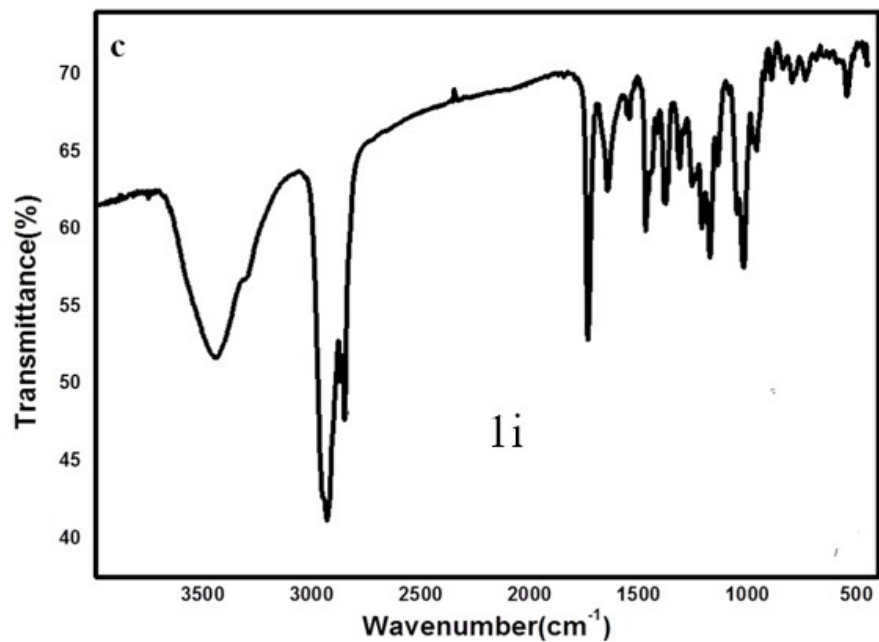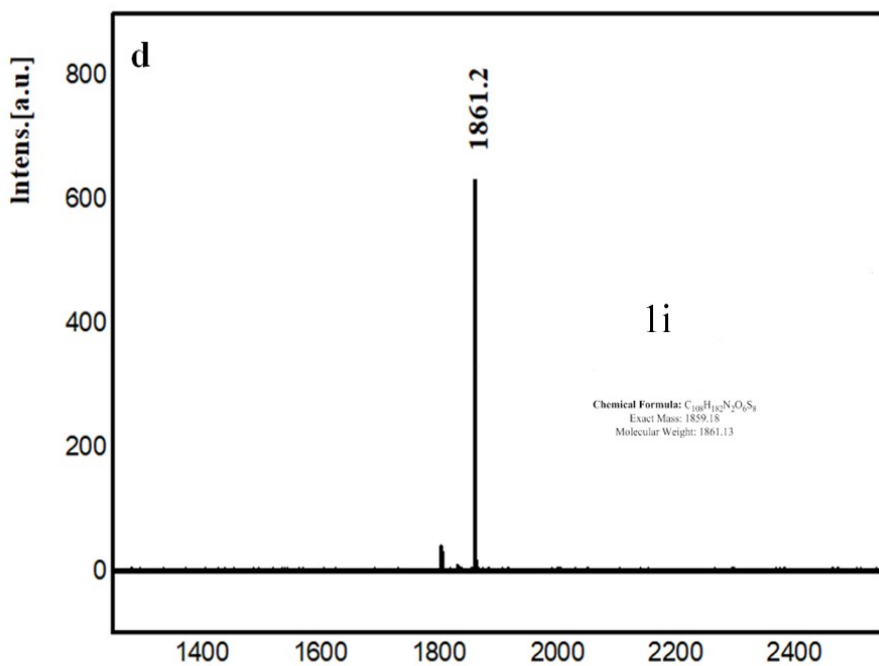

**Fig. S16** (a) <sup>1</sup>H NMR of the target compound **1i**  
 (b) <sup>13</sup>C NMR of the target compound **1i**  
 (c) FT-IR of the target compound **1i**  
 (b) MALDI-TOF-MS of the target compound **1i**

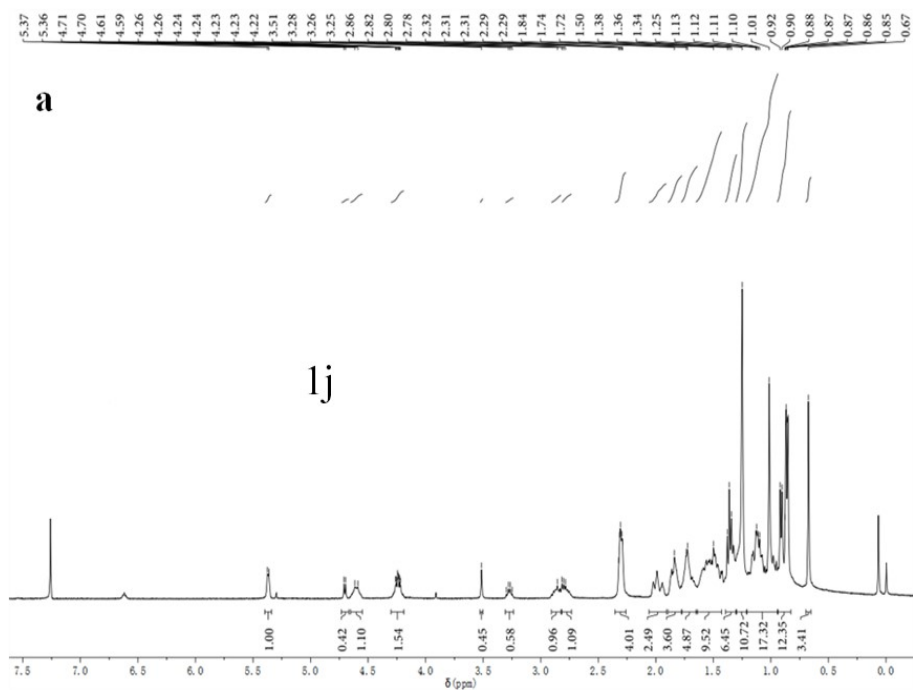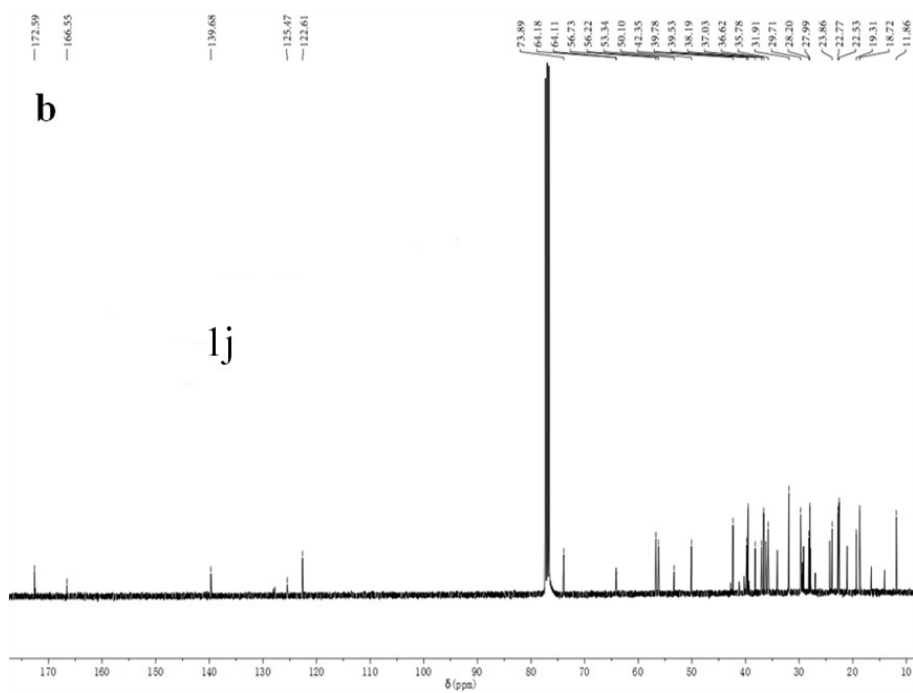

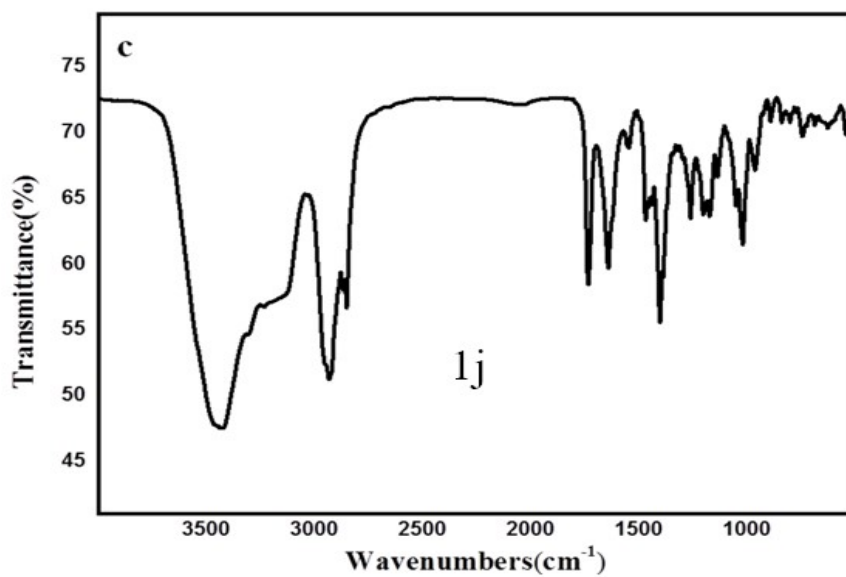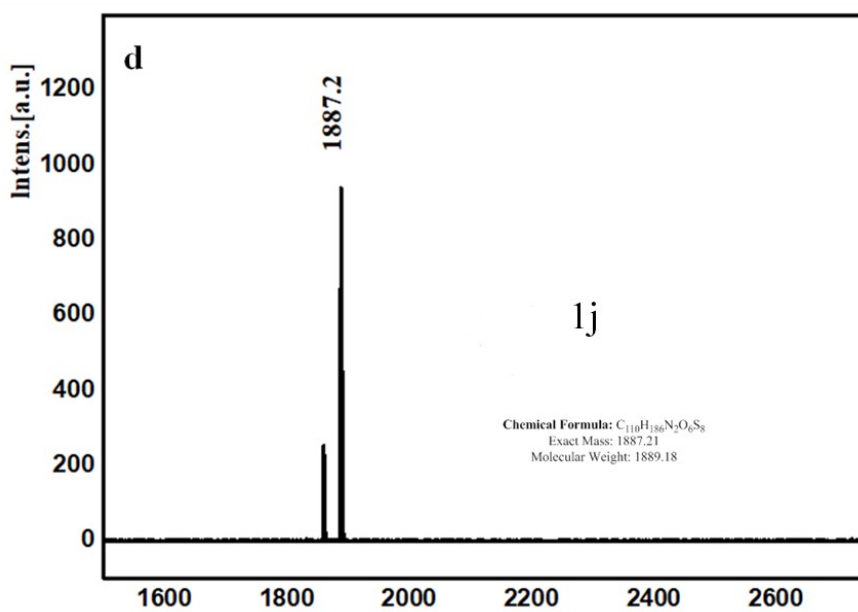

**Fig. S17** (a) <sup>1</sup>H NMR of the target compound **1j**  
 (b) <sup>13</sup>C NMR of the target compound **1j**  
 (c) FT-IR of the target compound **1j**  
 (d) MALDI-TOF-MS of the target compound **1j**

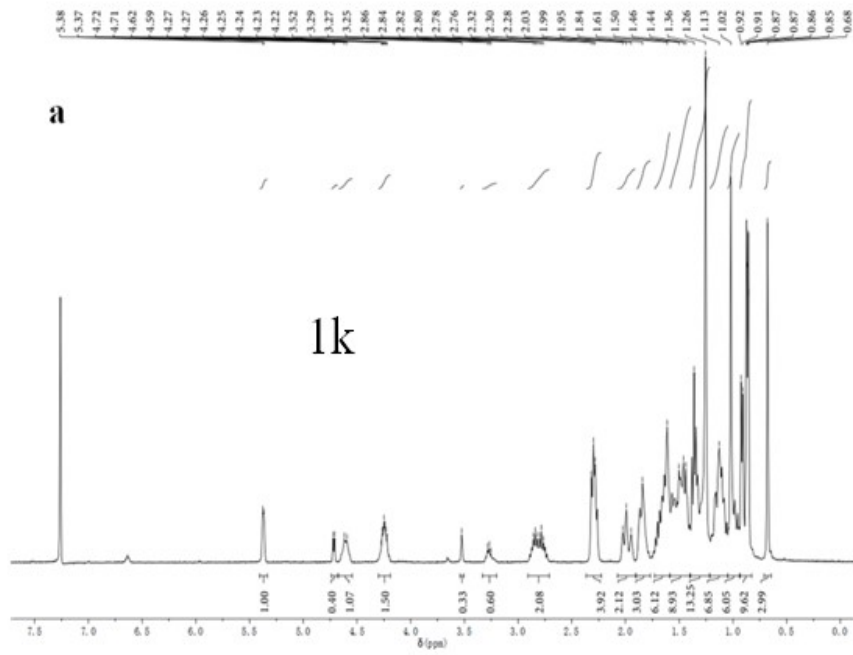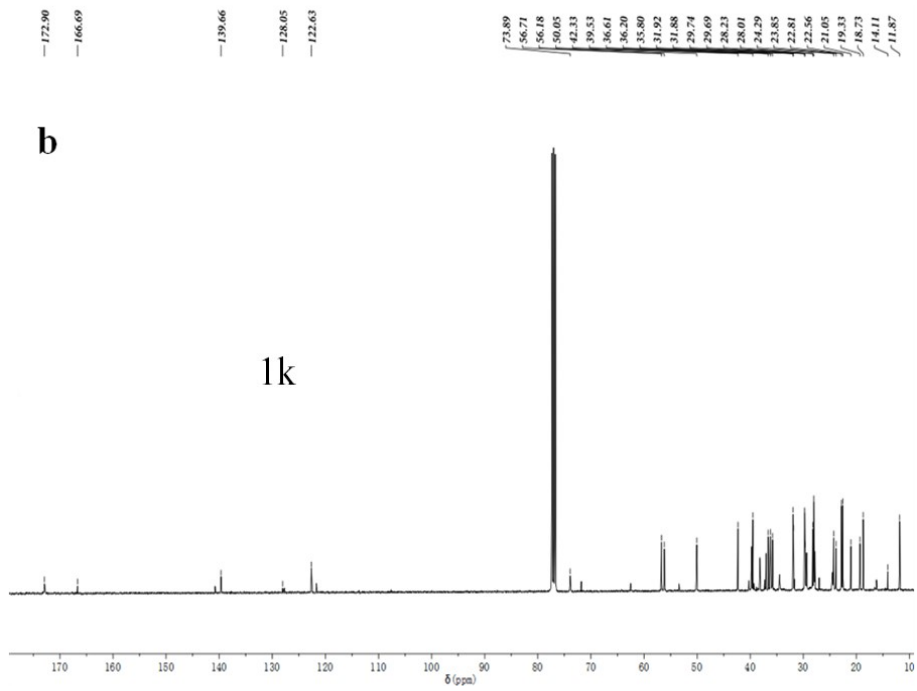

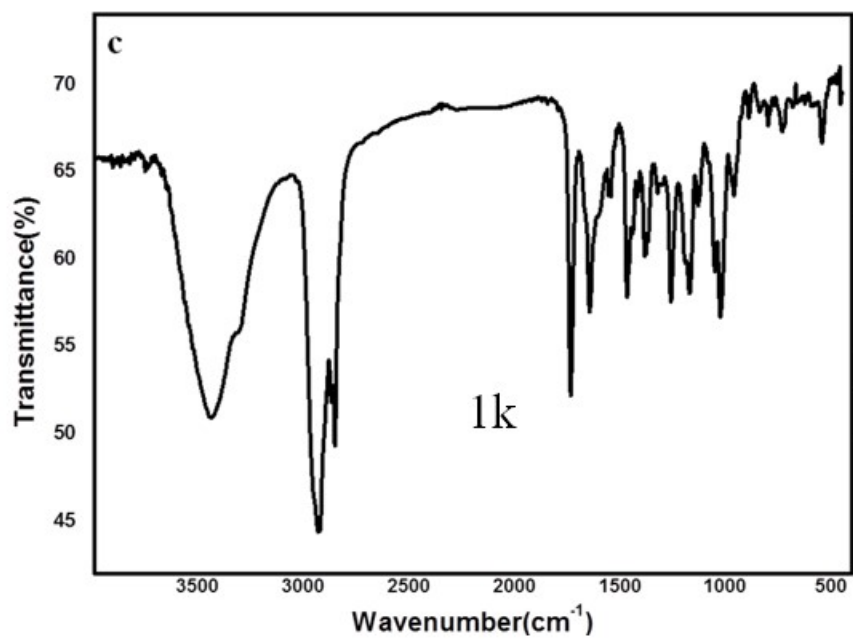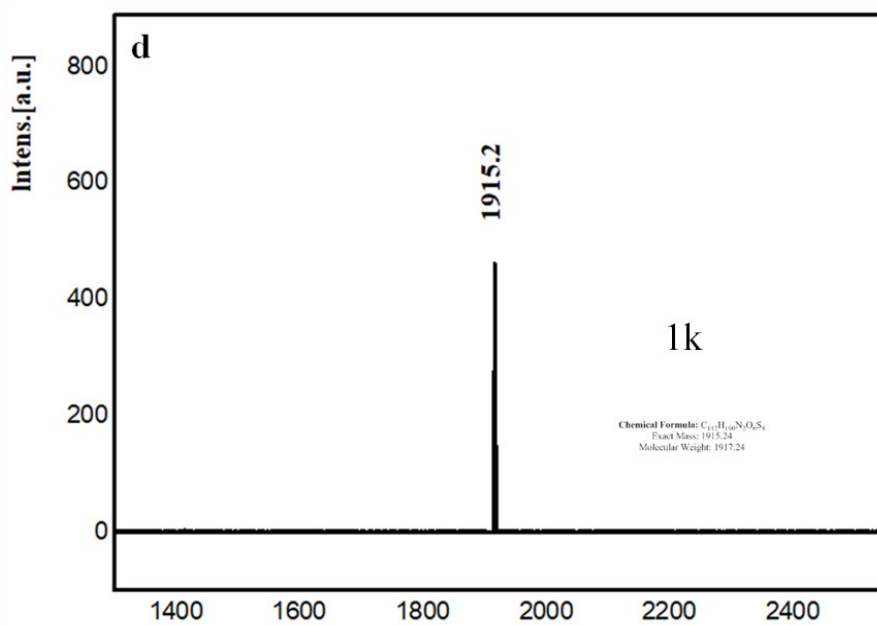

**Fig. S18 (a)** <sup>1</sup>H NMR of the target compound **1k**  
**(b)** <sup>13</sup>C NMR of the target compound **1k**  
**(c)** FT-IR of the target compound **1k**  
**(b)** MALDI-TOF-MS of the target compound **1k**



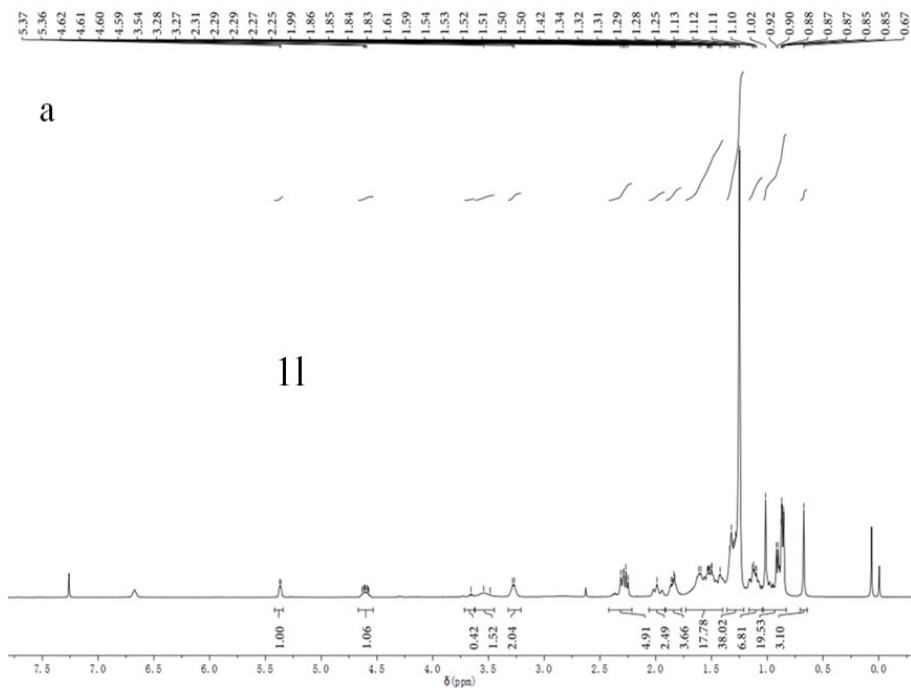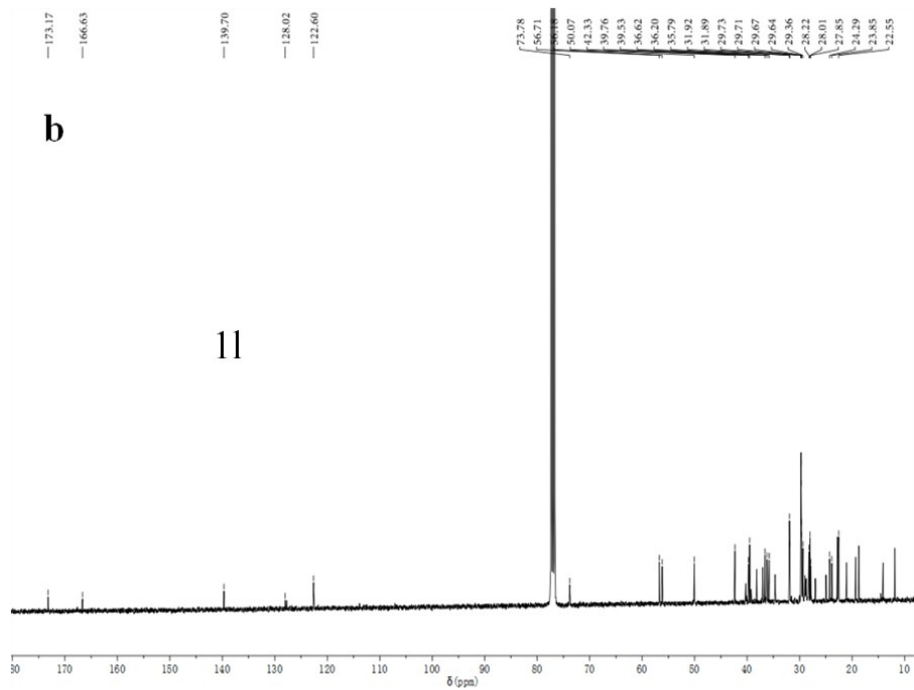

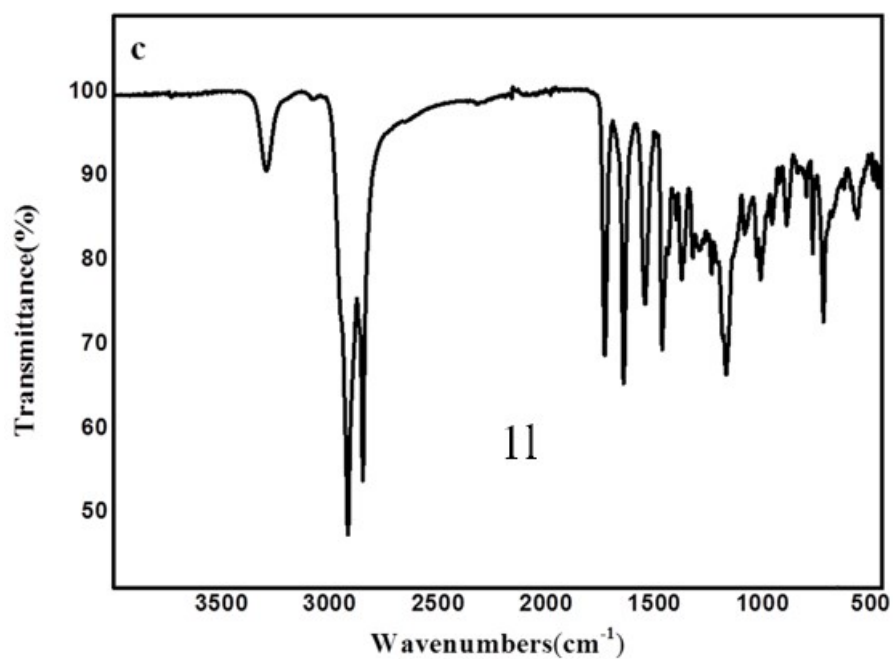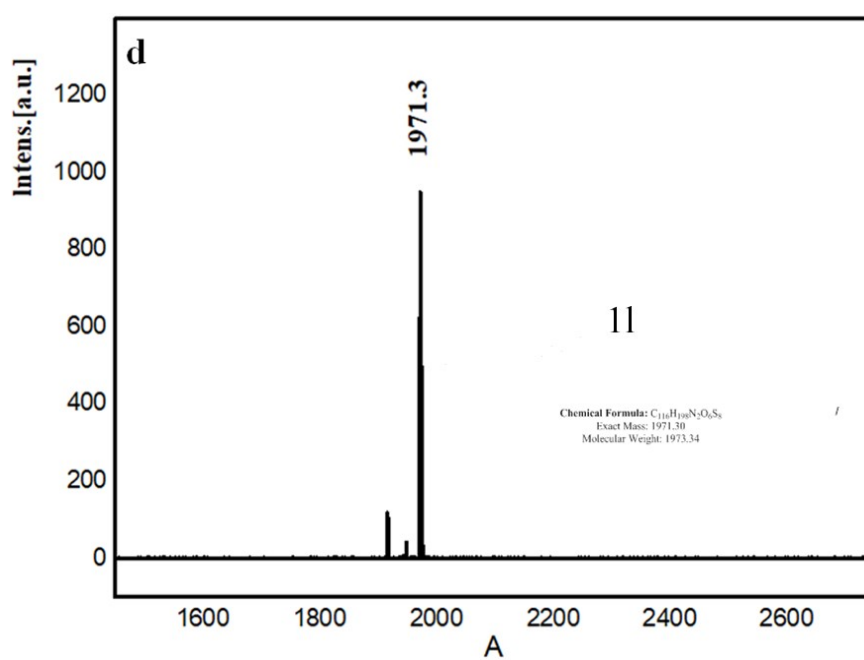

**Fig. S19** (a) <sup>1</sup>H NMR of the target compound **1j**  
 (b) <sup>13</sup>C NMR of the target compound **1j**  
 (c) FT-IR of the target compound **1j**  
 (d) MALDI-TOF-MS of the target compound **1j**

### 3. Additional data

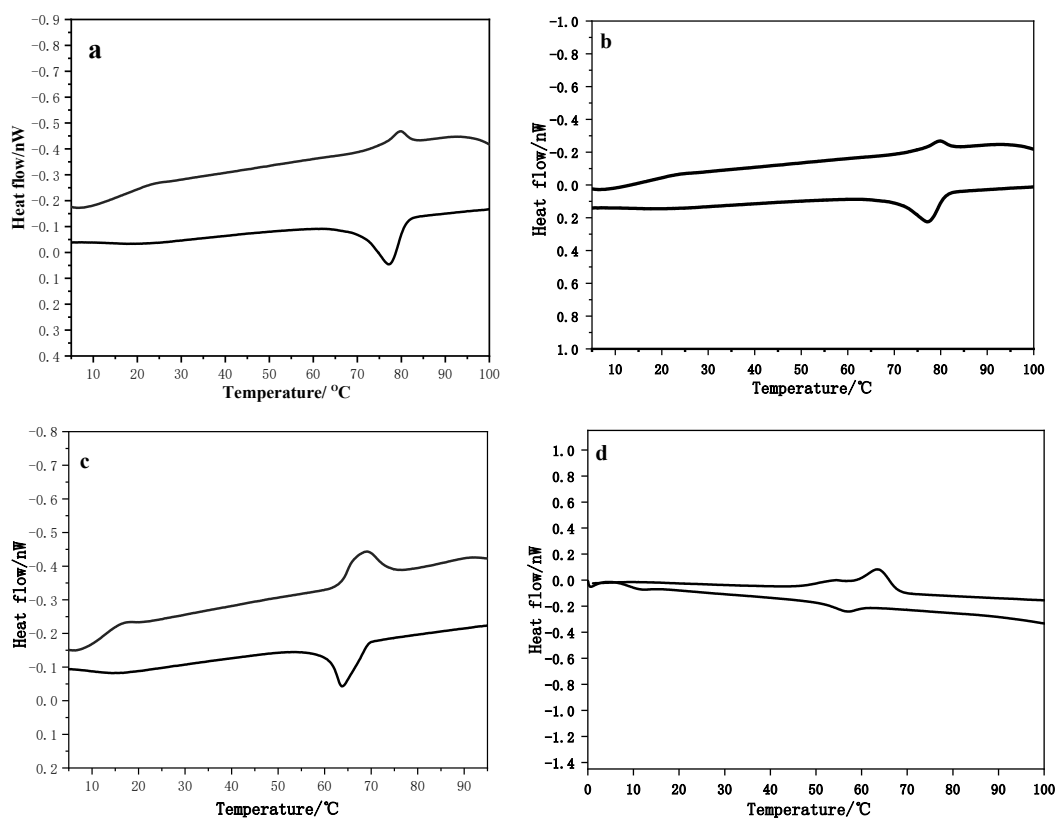

**Fig. S20** DSC traces (10 °C/min) recorded during the second heating and the second cooling scan of compounds **1e(a)**, **1f(b)**, **1i(c)**, **1k(d)**

**Table S1** Phase transition temperature and enthalpy changes of **1e**, **1f**, **1i**, **1k** determined by DSC in the second cooling scan<sup>a</sup>

| Compd     | Transition temperature(°C) and enthalpy changes (J g <sup>-1</sup> )  | $\Delta T^b$ /°C | $T_d^c$ /°C |
|-----------|-----------------------------------------------------------------------|------------------|-------------|
|           | 1), Heating cycle/Cooling cycle                                       |                  |             |
| <b>1e</b> | g 11.4 S <sub>A</sub> 75.8 (1.55) I/I 77.2 (7.5) S <sub>A</sub> 9.9 g | 64.4             | 263         |
| <b>1f</b> | g 18.1 S <sub>A</sub> 77.5 (2.7) I/I 72.5 (3.8) S <sub>A</sub> 17.2g  | 59.5             | 267         |
| <b>1i</b> | g 9.4 S <sub>A</sub> 63.6 (3.7) I/I 60.3 (3.2) S <sub>A</sub> 6.8g    | 53.2             | 262         |
| <b>1j</b> | g 9.2 S <sub>A</sub> 66.4 (4.9) I/I 64.6 (4.4) S <sub>A</sub> 6.4g    | 57.2             | 271         |
| <b>1k</b> | g 6.7 S <sub>A</sub> 59.5 (1.7) I/I 52.6 (4.4) S <sub>A</sub> 6.3g    | 53.8             | 268         |

<sup>a</sup> g=glass state, S<sub>A</sub>=smectic A, , I=isotropic.

<sup>b</sup> Mesophase temperature ranges on heating cycle.

<sup>c</sup> Temperature at which 5% weight loss occurred.

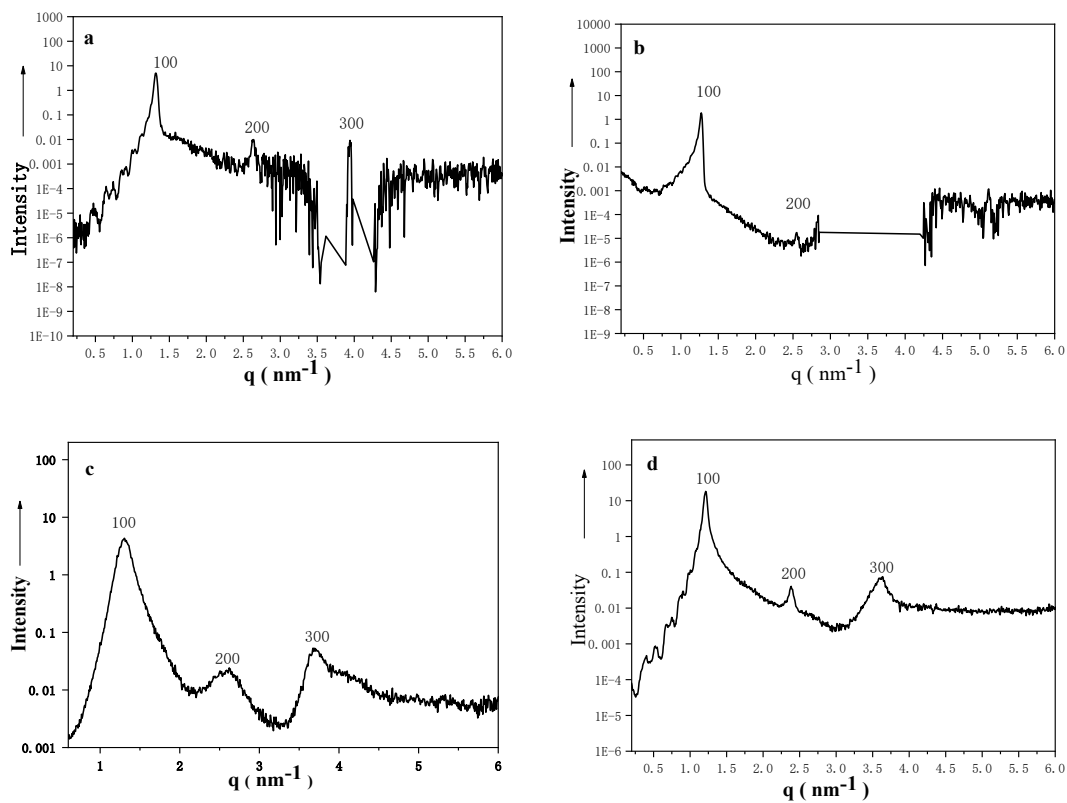

**Fig. S21** SAXS patterns along with possible assembled structures (inset) of compound **1e** (a), **1f**(b), **1i**(c), **1h**(d) at  $40^\circ\text{C}$  on cooling from the isophase.

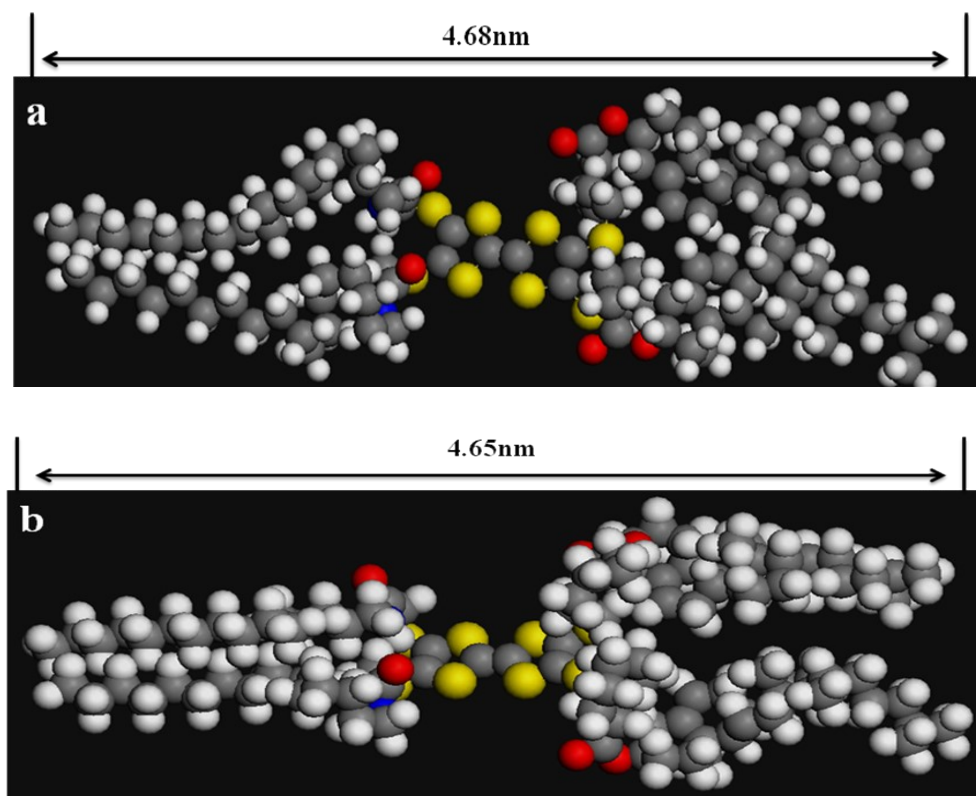

**Fig. S22** CPK model of **1k(a)** and **1h(b)**

**Table S2** SAXS data for the selected compounds

| Compd     | Measured spacing/nm |           |           |
|-----------|---------------------|-----------|-----------|
| <b>1e</b> | 4.83(100)           | 2.41(200) | 1.61(300) |
| <b>1f</b> | 4.94(100)           | 2.47(200) | -(300)    |
| <b>1i</b> | 4.86(100)           | 2.42(200) | 1.67(300) |
| <b>1j</b> | 5.23(100)           | 2.64(200) | 1.74(300) |
| <b>1k</b> | 5.21(100)           | 2.63(200) | 1.73(300) |

**Table S3** Gelation properties of **1a–d** in various solvents

| Solvent              | <b>1a</b>     | <b>1b</b>    | <b>1c</b>     | <b>1d</b>     |
|----------------------|---------------|--------------|---------------|---------------|
| Cyclohexane          | TG(7.6mg/mL)  | TG(5.8mg/mL) | TG(3.6mg/mL)  | TG(1.7mg/mL)  |
| n-hexane             | IS            | IS           | IS            | OG(5mg/mL)    |
| Benzene              | S             | S            | S             | S             |
| Toluene              | S             | S            | S             | S             |
| Chlorobenzene        | S             | S            | S             | S             |
| Xylene               | S             | S            | S             | S             |
| Carbon tetrachloride | S             | S            | S             | S             |
| Isopropanol          | sS            | P            | IS            | OG(5.5mg/mL)  |
| Ethyl acetate        | OG(21.4mg/mL) | OG(11mg/mL)  | OG(7.1mg/mL)  | OG(7.3mg/mL)  |
| Tetrahydrofuran      | S             | S            | S             | S             |
| Methanol             | IS            | IS           | IS            | IS            |
| Ethanol              | IS            | IS           | IS            | sS            |
| Acetonitrile         | IS            | IS           | IS            | IS            |
| Diethyl ether        | IS            | IS           | IS            | sS            |
| DMF                  | sS            | P            | TG(11.7mg/mL) | TG(7.3mg/mL)  |
| DMSO                 | sS            | P            | P             | P             |
| Acetone              | IS            | IS           | TG(18mg/mL)   | IS            |
| 1,2-Dichloroethane   | S             | S            | S             | S             |
| Cyclohexanol         | sS            | TG(18mg/mL)  | OG(16.9mg/mL) | TG(3.1mg/mL)  |
| N-butyl alcohol      | TG(15.4mg/mL) | OG(11mg/mL)  | TG(6.36mg/mL) | OG(16.9mg/mL) |
| Methylcyclohexane    | S             | S            | S             | S             |
| Dichloromethane      | S             | S            | S             | S             |

OG=opaque gel; TG=transparent gel; PG=part gel; P=precipitation; S=soluble; IS=insoluble; sS=slight soluble. CGC=the critical gelation concentrations(mg/mL) at room temperature.

**Table S4** Gelation properties of **1e–h** in various solvents

| Solvent              | <b>1e</b>     | <b>1f</b>     | <b>1g</b>     | <b>1h</b>    |
|----------------------|---------------|---------------|---------------|--------------|
| Cyclohexane          | TG(1.7mg/mL)  | TG(2.7mg/mL)  | TG(2.6mg/mL)  | TG(1.0mg/mL) |
| n-hexane             | IS            | IS            | sS            | OG(3.9mg/mL) |
| Benzene              | TG(12.0mg/mL) | TG(18.2mg/mL) | TG(20.0mg/mL) | S            |
| Toluene              | TG(7.7mg/mL)  | TG(14.1mg/mL) | TG(19.0mg/mL) | S            |
| Chlorobenzene        | S             | S             | S             | S            |
| Xylene               | TG(5.1mg/mL)  | TG(12.4mg/mL) | TG(13.0mg/mL) | S            |
| Carbon tetrachloride | TG(14.7mg/mL) | TG(13.8mg/mL) | S             | S            |
| Isopropanol          | P             | P             | OG(9.0mg/mL)  | P            |
| Ethyl acetate        | IS            | IS            | OG(7.1mg/mL)  | P            |
| Tetrahydrofuran      | S             | S             | S             | S            |
| Methanol             | IS            | IS            | IS            | IS           |
| Ethanol              | IS            | sS            | IS            | sS           |
| Acetonitrile         | IS            | IS            | IS            | IS           |
| Diethyl ether        | IS            | IS            | IS            | sS           |
| DMF                  | OG(5.8mg/mL)  | IS            | OG(10.5mg/mL) | OG(8.5mg/mL) |
| DMSO                 | OG(28.8mg/mL) | IS            | P             | P            |
| Acetone              | IS            | IS            | P             | IS           |
| 1,2-Dichloroethane   | TG(8.8mg/mL)  | TG(8.8mg/mL)  | S             | TG(7.8mg/mL) |
| Cyclohexanol         | TG(10.5mg/mL) | TG(10.0mg/mL) | TG(10.5mg/mL) | TG(9.5mg/mL) |
| N-butyl alcohol      | OG(3.1mg/mL)  | IS            | OG(18mg/mL)   | OG(4.8mg/mL) |
| Methylcyclohexane    | S             | S             | S             | S            |
| Dichloromethane      | S             | S             | S             | S            |

OG=opaque gel; TG=transparent gel; PG=part gel; P=precipitation; S=soluble; IS=insoluble; sS=slight soluble. CGC=the critical gelation concentrations(mg/mL) at room temperature.

**Table S5** Gelation properties of **1i–1** in various solvents

| Solvent              | <b>1i</b>     | <b>1j</b>     | <b>1k</b>     | <b>1l</b>     |
|----------------------|---------------|---------------|---------------|---------------|
| Cyclohexane          | TG(2.3mg/mL)  | TG(3.3mg/mL)  | TG(9.0mg/mL)  | TG(3.8mg/mL)  |
| n-hexane             | IS            | IS            | S             | OG(2.5mg/mL)  |
| Benzene              | TG(5.4mg/mL)  | TG(10.5mg/mL) | S             | TG(23.0mg/mL) |
| Toluene              | S             | TG(11.0mg/mL) | TG(48.0mg/mL) | TG(19.0mg/mL) |
| Chlorobenzene        | S             | S             | S             | S             |
| Xylene               | TG(2.3mg/mL)  | TG(10.5mg/mL) | S             | TG(23.0mg/mL) |
| Carbon tetrachloride | TG(4.4mg/mL)  | TG(11.4mg/mL) | S             | TG(22.0mg/mL) |
| Isopropanol          | P             | P             | P             | OG(8.7mg/mL)  |
| Ethyl acetate        | OG(14.0mg/mL) | OG(16.0mg/mL) | P             | OG(2.9mg/mL)  |
| Tetrahydrofuran      | S             | S             | S             | S             |
| Methanol             | IS            | IS            | IS            | IS            |
| Ethanol              | IS            | sS            | IS            | sS            |
| Acetonitrile         | IS            | IS            | IS            | IS            |
| Diethyl ether        | IS            | IS            | sS            | sS            |
| DMF                  | OG(3.7mg/mL)  | P             | P             | IS            |
| DMSO                 | OG(24.0mg/mL) | P             | P             | sS            |
| Acetone              | IS            | IS            | P             | sS            |
| 1,2-Dichloroethane   | TG(2.0mg/mL)  | TG(12.0mg/mL) | S             | TG(6.5mg/mL)  |
| Cyclohexanol         | TG(6.0mg/mL)  | OG(11.0mg/mL) | S             | TG(1.9mg/mL)  |
| N-butyl alcohol      | P             | P             | P             | OG(1.8mg/mL)  |
| Methylcyclohexane    | S             | S             | S             | S             |
| Dichloromethane      | S             | S             | S             | S             |

OG=opaque gel; TG=transparent gel; PG=part gel; P=precipitation; S=soluble; IS=insoluble; sS=slight soluble. CGC=the critical gelation concentrations(mg/mL) at room temperature.



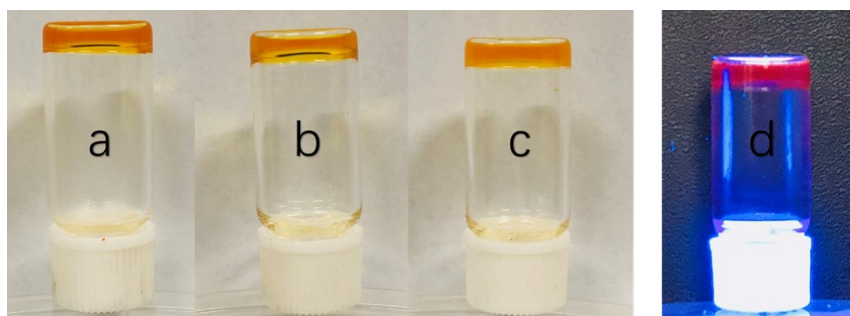

**Fig. S23** Photographs of organogel **1b** in different solvents: (a) cyclohexanol; (b) cyclohexane; (c) ethyl acetate; (d) rhodamine B in cyclohexane and the corresponding fluorescent organogel under UV light (wavelength: 365 nm).

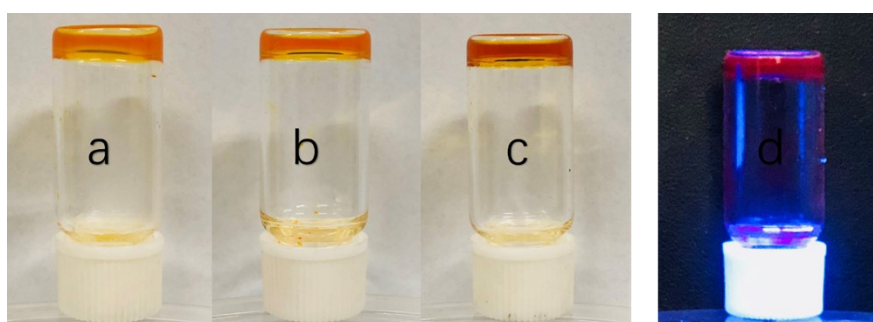

**Fig. S24** Photographs of organogel **1f** in different solvents: (a) cyclohexanol; (b) cyclohexane; (c) 1,2-dichloroethane; (d) rhodamine B in cyclohexane and the corresponding fluorescent organogel under UV light (wavelength: 365 nm).

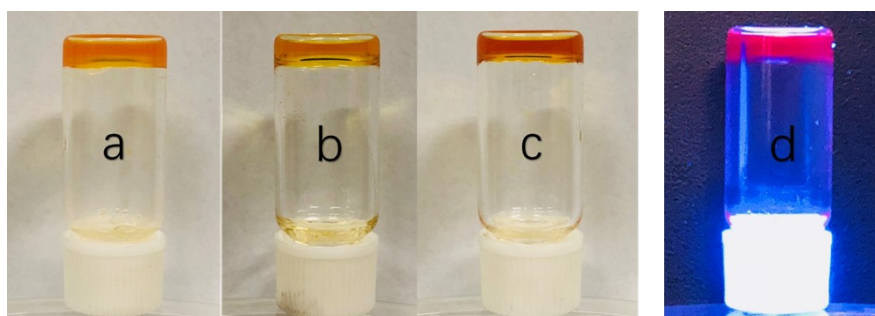

**Fig. S25** Photographs of organogel **1j** in different solvents: (a) cyclohexanol; (b) cyclohexane; (c) 1,2-dichloroethane; (d) rhodamine B in cyclohexane and the corresponding fluorescent organogel under UV light (wavelength: 365 nm).

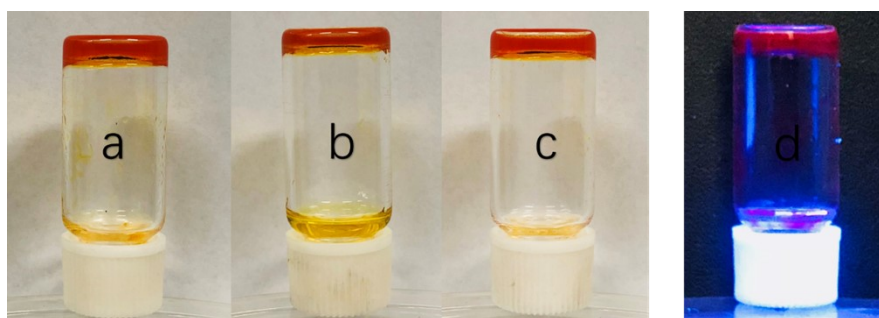

**Fig. S26** Photographs of organogel **1k** in different solvents: (a) benzene; (b) toluene; (c) carbon tetrachloride; (d) rhodamine B in cyclohexane and the corresponding fluorescent organogel under UV light (wavelength: 365 nm).

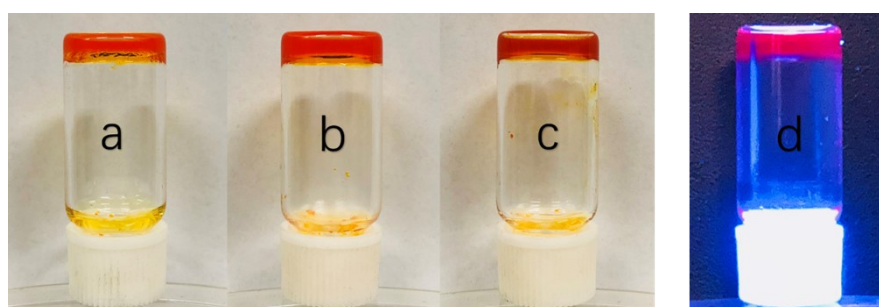

**Fig. S27** Photographs of organogel **1l** in different solvents: (a) benzene; (b) xylene; (c) carbon tetrachloride; (d) rhodamine B in cyclohexane and the corresponding fluorescent organogel under UV light (wavelength: 365 nm).

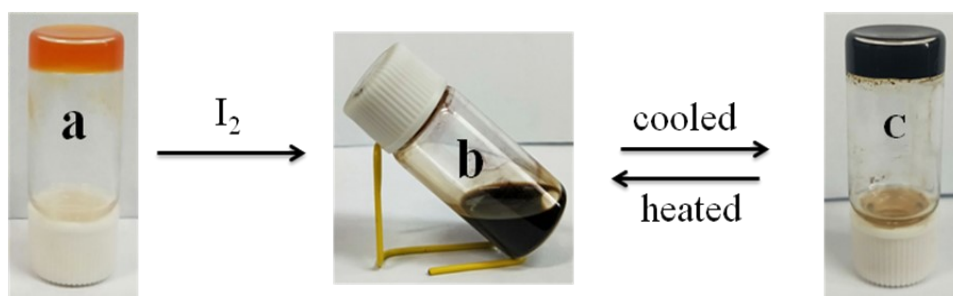

**Fig. S28** Tuning the gel formation with the addition of  $I_2$ . (a) a cyclohexane organogel of **1b**; (b) a brown solution of the CT complex; and (c) a brown binary gel of the CT complex.

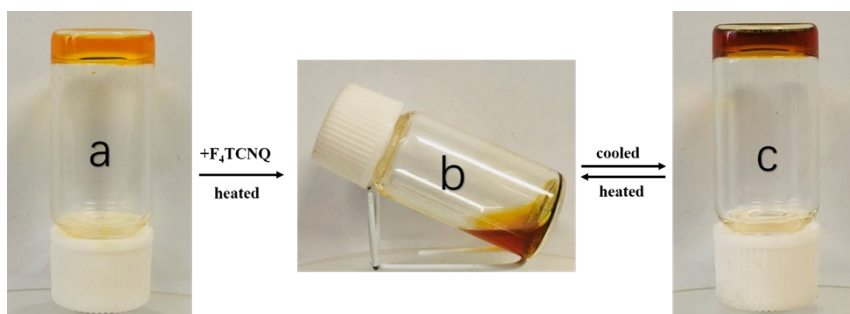

**Fig. S29** Tuning the gel formation with the addition of  $F_4TCNQ$ . (a) a cyclohexane organogel of **1b**; (b) a brown solution of the CT complex; and (c) a brown binary gel of the CT complex.

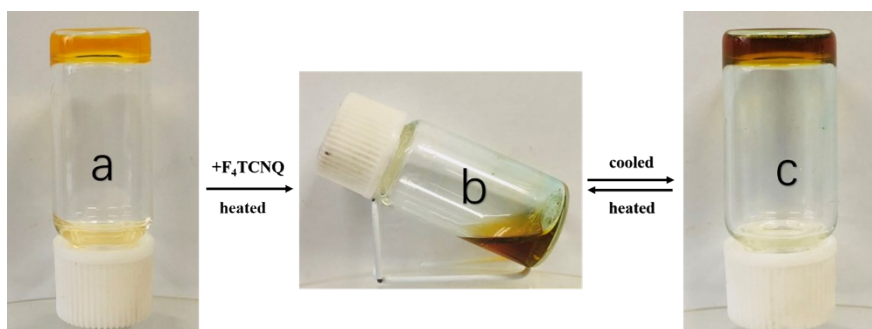

**Fig. S30** Tuning the gel formation with the addition of  $F_4TCNQ$ . (a) a cyclohexane organogel of **1f**; (b) a dark-brown solution of the CT complex; and (c) a dark-brown binary gel of the CT complex.

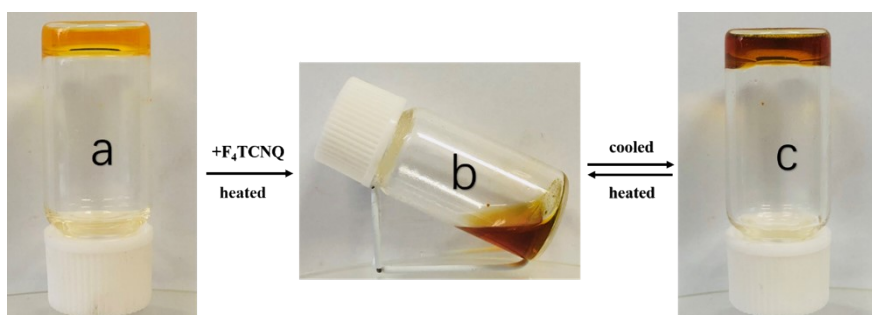

**Fig. S31** Tuning the gel formation with the addition of  $F_4TCNQ$ . (a) a cyclohexane organogel of **1j**; (b) a brown solution of the CT complex; and (c) a brown binary gel of the CT complex.

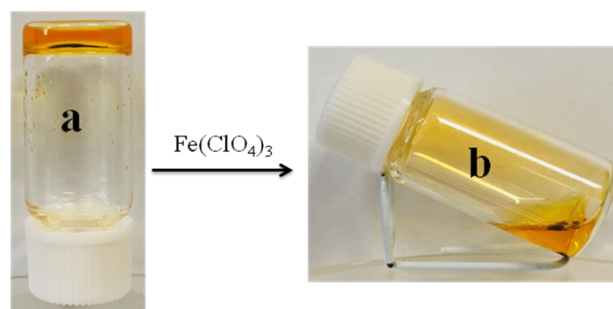

**Fig. S32** Tuning the gel formation with the addition of  $\text{Fe}^{3+}$ . (a) a cyclohexane organogel of **1j**; (b) a dark brown suspension gel of the CT complex.

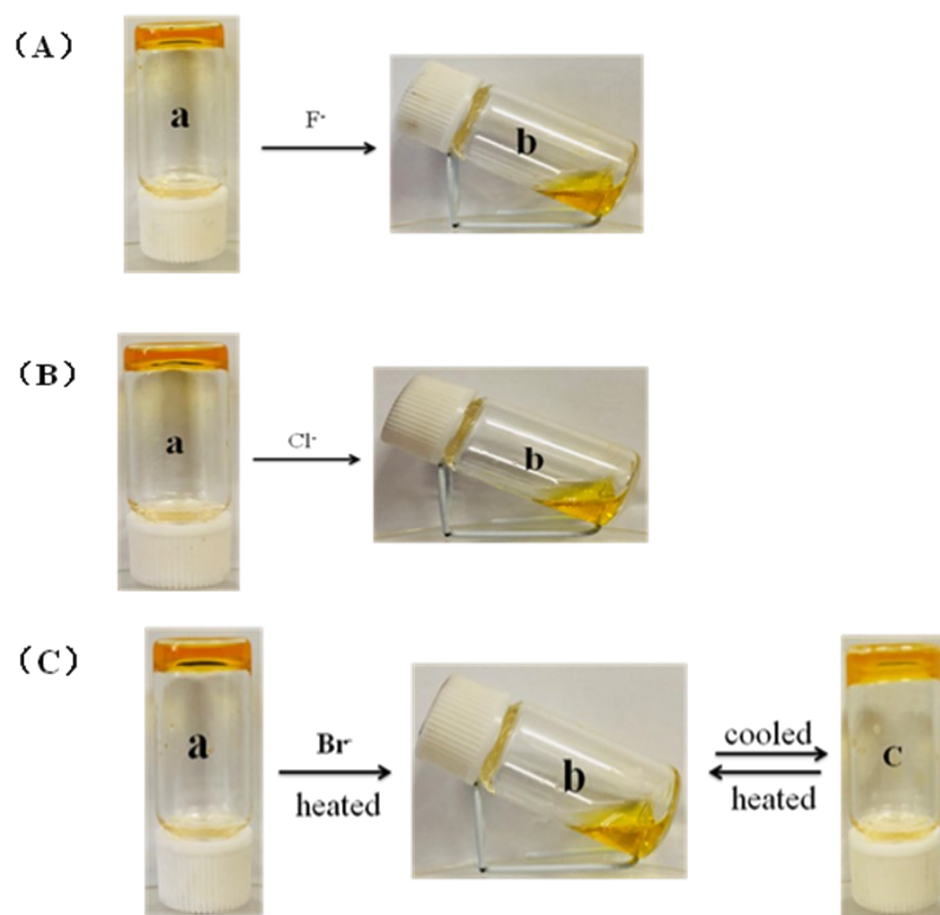

**Fig. S33** Photographs of native gel of **1** in cyclohexane upon the addition of 2.0 equiv of each anion, from top to bottom is native gel (A),  $\text{F}^-$  (B),  $\text{Cl}^-$  (C),  $\text{Br}^-$ .

**Table S6** The calculated thermodynamic parameters of gelation

| Parameters                                          | <b>1c</b> | <b>1g</b>  | <b>1k</b> |
|-----------------------------------------------------|-----------|------------|-----------|
| $\delta(\ln\phi) / \delta T$                        | 0.05179   | 0.19625    | 0.09029   |
| $\Delta G$ (KJ·mol <sup>-1</sup> ·K <sup>-1</sup> ) | -20975.53 | -22192.46  | -21457.42 |
| $\Delta G$ (KJ·mol <sup>-1</sup> ·K <sup>-1</sup> ) | -43583.27 | -153929.10 | -70358.76 |
| $\Delta S$ (J·mol <sup>-1</sup> ·K <sup>-1</sup> )  | -71.06    | -428.90    | -159.73   |

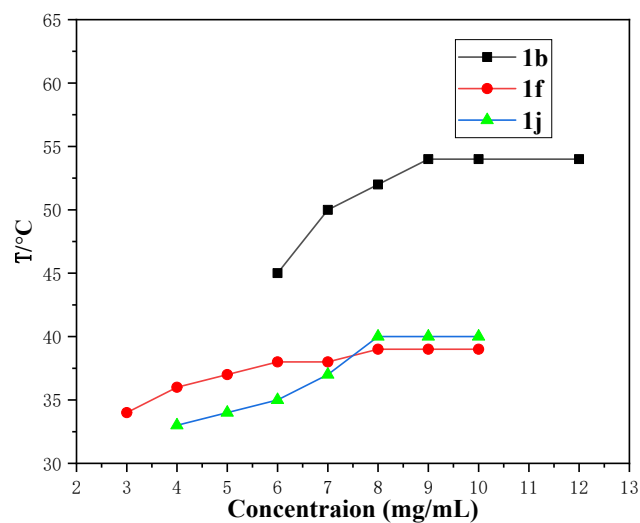

**Fig. S34** Plots of  $T_{gel}$  versus the concentration of **1b**, **1f**, **1j** in cyclohexane.

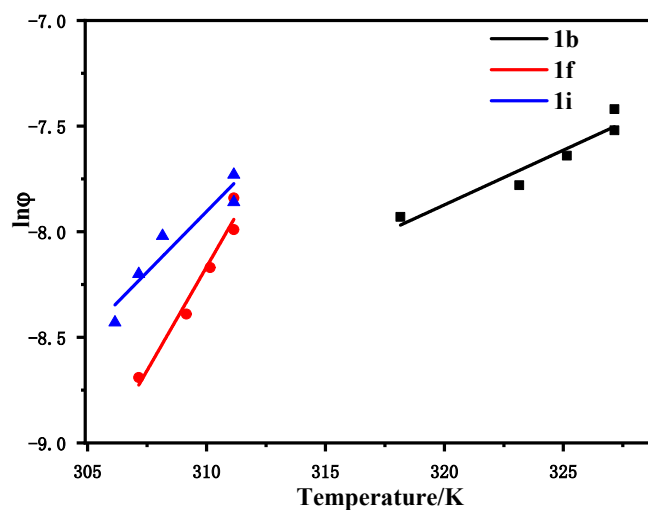

**Fig. S35** Plots of  $\ln\phi$  vs.  $T$  for organogels of **1b** (■), **1f** (●), **1j** (▲) in cyclohexane.

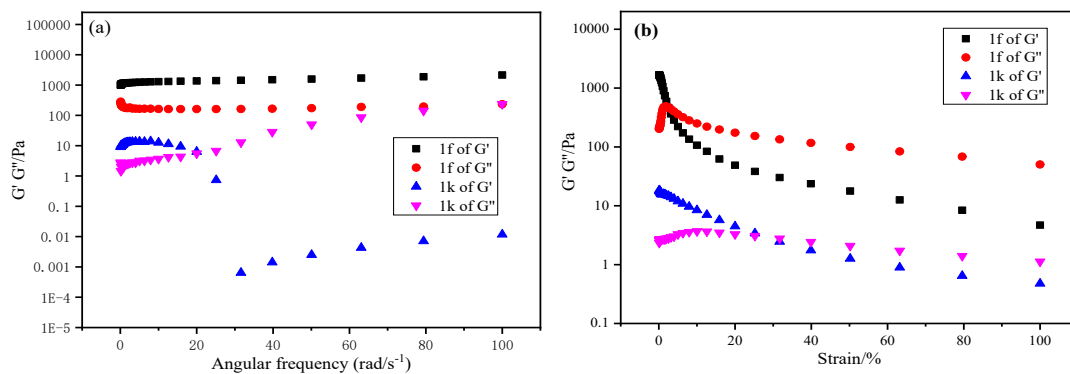

**Fig. 36** (a) Frequency dependence of the storage modulus ( $G'$ ) and loss modulus ( $G''$ ) of **1f** and **1k** gels in cyclohexane. The strain amplitude was 0.1%; (b) amplitude dependence of the storage modulus ( $G'$ ) and loss modulus ( $G''$ ) of **1f** and **1k** gels in cyclohexane. The frequency was 1 Hz.

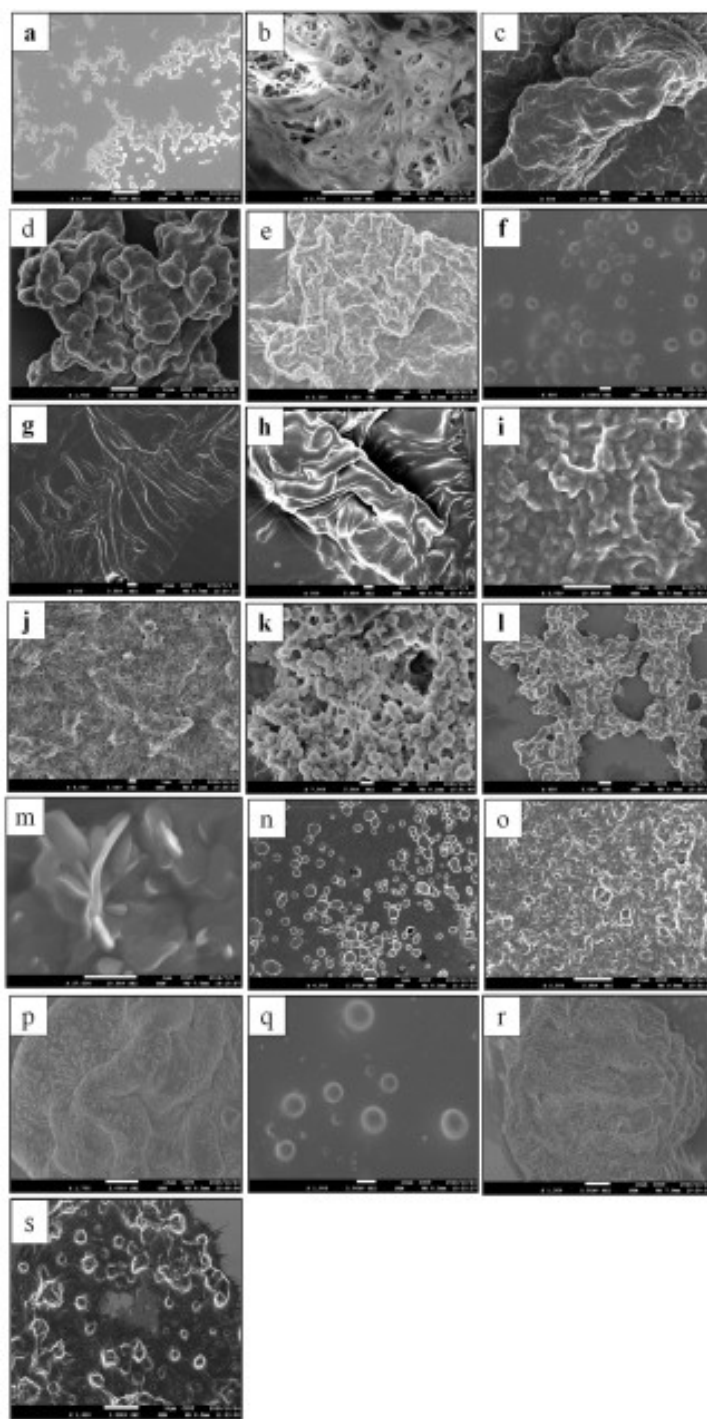

**Fig. S37** FE-SEM images of xerogels of **1** in (a) **1a**; (b) **1b** in cyclohexane; (c) **1c** in cyclohexane; (d) **1c** in ethyl acetate; (e) **1c** in n-butyl alcohol; (f) **1f** in cyclohexane; (g) **1f** in benzene; (h) **1f** in p-xylene; (i) **1f** in cyclohexanol; (j) **1g** in DMF; (k) **1h** in DMF; (l) **1l** in cyclohexane; (m) **1j** in dichloromethane; (n) **1k** in cyclohexane; (o) **1l** in dichloromethane; (p) **1l** in benzene; (q) **1l** in cyclohexane; (r) **1l** in methylbenzene; (s) **1l** in isopropanocyclohexanel.

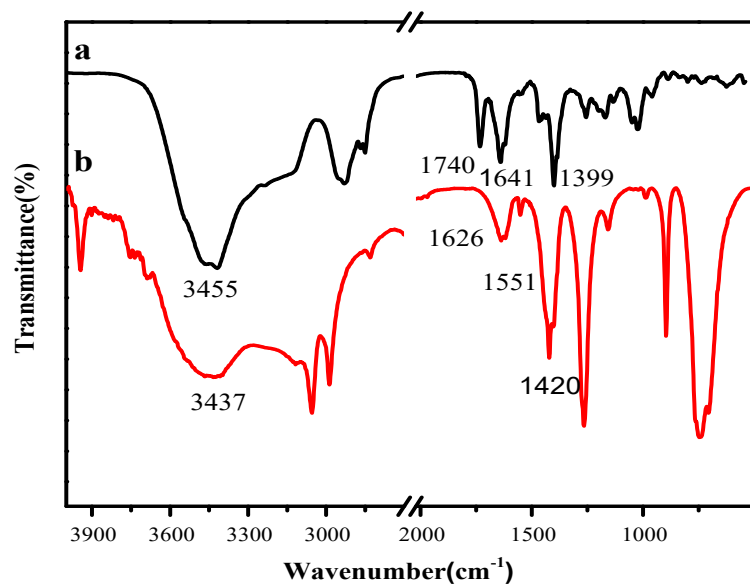

**Fig. S38** FT-IR spectra of **11** in  $\text{CH}_2\text{Cl}_2$  solution (a), native xerogel of **11** from toluene (b), native xerogel of **11** from cyclohexane.

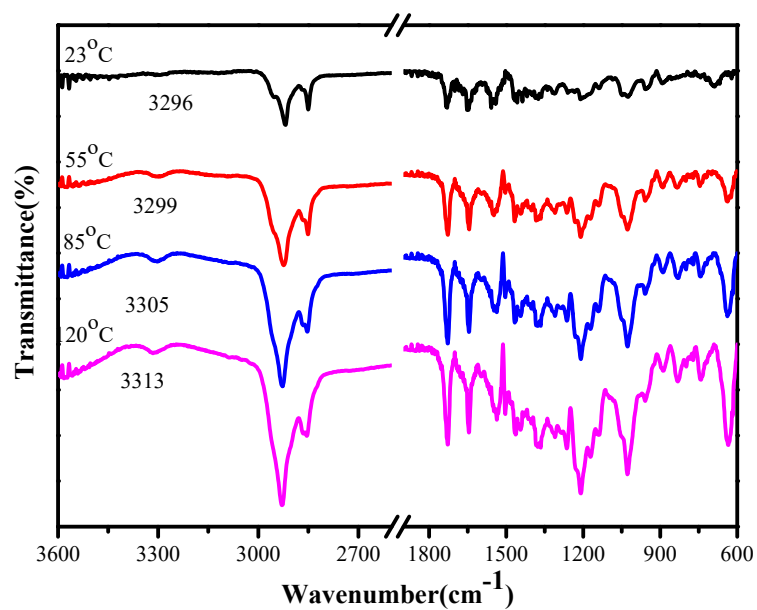

**Fig. S39** In situ temperature-dependent FT-IR spectra of xerogel **11**.



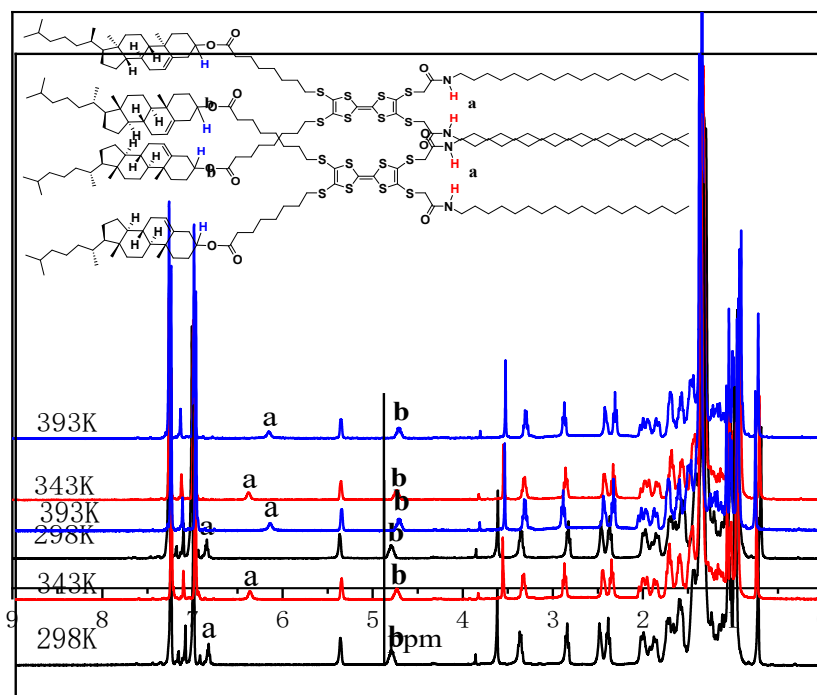

**Fig. S40**  $^1\text{H}$ NMR spectra of the gel formed with compound **II** (15 mg/mL in  $\delta\text{-C}_6\text{D}_4\text{Cl}_2$ ) at different temperatures: 298 K; 343 K and 393 K
